# Supplementary material for: A depauperate immune repertoire precedes evolution of sociality in bees
Source: PubMed Central journal article supplement (PMC4408586; doi:10.1186/s13059-015-0628-y), 2015-04-24
Supplement: 13059_2015_628_MOESM1_ESM.pdf [file 13059_2015_628_MOESM1_ESM.pdf]

Statistics for the global  $\omega$  ratio obtained by the M0 model (4 taxa tree).

|                           | Global $\omega$ | Tree length (dN) | Tree length (dS) |
|---------------------------|-----------------|------------------|------------------|
| <i>Mean</i>               | 0.11557         | 0.17356          | 1.66915          |
| <i>Median</i>             | 0.09789         | 0.08910          | 0.91565          |
| <i>Variance</i>           | 0.00750         | 0.17117          | 17.27791         |
| <i>Standard deviation</i> | 0.08661         | 0.41373          | 4.15667          |
| <i>Standard error</i>     | 0.00707         | 0.03378          | 0.33939          |
