# Supplementary material for: A depauperate immune repertoire precedes evolution of sociality in bees
Source: PubMed Central journal article supplement (PMC4408586; doi:10.1186/s13059-015-0628-y), 2015-04-24
Supplement: 13059_2015_628_MOESM2_ESM.pdf [file 13059_2015_628_MOESM2_ESM.pdf]

Statistics for the global  $\omega$  ratio obtained by the M0 model (5 taxa tree).

|                           | Global $\omega$ | Tree length (dN) | Tree length (dS) |
|---------------------------|-----------------|------------------|------------------|
| <i>Mean</i>               | 0.09567         | 0.28551          | 3.34022          |
| <i>Median</i>             | 0.07891         | 0.16430          | 1.87740          |
| <i>Variance</i>           | 0.00473         | 0.16945          | 25.99466         |
| <i>Standard deviation</i> | 0.06881         | 0.41165          | 5.09850          |
| <i>Standard error</i>     | 0.00579         | 0.03467          | 0.42937          |
