# Supplementary material for: A depauperate immune repertoire precedes evolution of sociality in bees
Source: PubMed Central journal article supplement (PMC4408586; doi:10.1186/s13059-015-0628-y), 2015-04-24
Supplement: 13059_2015_628_MOESM3_ESM.pdf [file 13059_2015_628_MOESM3_ESM.pdf]

The 30 fastest evolving genes on the 4 taxa tree as determined by the M0 model

| OrthoDB group <sup>a</sup> | Gene <sup>b</sup>      | Classification                       | Global $\omega$ <sup>c</sup> | Tree Length <sup>d</sup> |
|----------------------------|------------------------|--------------------------------------|------------------------------|--------------------------|
| EOG6TX97R                  | CLIP–D1–like protein   | CLIP serine protease                 | 0.36655                      | 1.2491                   |
| EOG6JSXPT                  | abaecin                | AMP                                  | 0.33584                      | 0.9080                   |
| EOG6QRFKP                  | CLIP–C1B               | CLIP serine protease                 | 0.32940                      | 1.0886                   |
| EOG6HDR8C                  | TLR–1                  | Toll receptor                        | 0.31941                      | 1.3837                   |
| EOG6RJDH9                  | scarface               | CLIP serine protease                 | 0.30015                      | 1.0860                   |
| EOG66Q57J                  | LOC100642902 (B. terr) | Serine protease inhibitor            | 0.29770                      | 1.0302                   |
| EOG6QNKCB                  | spatzle–1B             | Spaetzle                             | 0.29567                      | 3.1566                   |
| EOG680GDM                  | eiger                  | c–Jun N–terminal kinases             | 0.27614                      | 1.0018                   |
| EOG6RV16R–1                | BGRP–1                 | GNBP                                 | 0.27490                      | 1.0508                   |
| EOG6RBP1C                  | persephone             | CLIP serine protease                 | 0.27289                      | 1.1464                   |
| EOG6FJ6RD                  | CLIP–B13               | CLIP serine protease                 | 0.26853                      | 0.9685                   |
| EOG6NCJV4                  | snake                  | CLIP serine protease                 | 0.26193                      | 0.9349                   |
| EOG6WDBSW                  | serpin–28D             | Serine protease inhibitor            | 0.25778                      | 1.2144                   |
| EOG66DJHQ                  | aubergine              | Small RNA regulatory pathway members | 0.25716                      | 1.3249                   |
| EOG69CNQ4–2                | IAP–1B                 | IAP repeat                           | 0.24138                      | 3.1745                   |
| EOG6TX97G                  | CLIP–D1                | CLIP serine protease                 | 0.22975                      | 1.2046                   |
| EOG6ZW3V0                  | fadd                   | IMD pathway                          | 0.22926                      | 1.0050                   |
| EOG6RJDHD                  | r2d2                   | Small RNA regulatory pathway members | 0.22813                      | 1.1397                   |
| EOG6RV16R–2                | BGRP–2                 | GNBP                                 | 0.22745                      | 1.0129                   |
| EOG6866VT                  | tube                   | Toll pathway                         | 0.22611                      | 1.0925                   |
| EOG6KKWHX                  | argonaute–2            | Small RNA regulatory pathway members | 0.22524                      | 1.2634                   |
| EOG6VX0NG–3                | PGRP–S1                | PRGP                                 | 0.22490                      | 0.9712                   |
| EOG6M37R0                  | serpin–27A             | Serine protease inhibitor            | 0.21958                      | 1.0711                   |
| EOG6HHMH6                  | serpin–23              | Scavenger receptor                   | 0.21578                      | 0.8905                   |
| EOG6XWDDG–3                | serpin–10B             | Serine protease inhibitor            | 0.21295                      | 1.2529                   |
| EOG61NS2P                  | CLIP–A5                | CLIP serine protease                 | 0.21220                      | 1.0629                   |
| EOG6RBP1B                  | cactus                 | Toll pathway                         | 0.21105                      | 1.4408                   |
| EOG6TDZ3C                  | defensin               | AMP                                  | 0.20810                      | 1.0139                   |
| EOG6DV43B                  | immune deficiency      | IMD pathway                          | 0.20362                      | 0.9836                   |
| EOG6VX0NG–2                | PGRP–S2                | PRGP                                 | 0.19318                      | 0.9017                   |

<sup>a</sup> Group identifiers are from OrthoDB 6 (<http://cegg.unige.ch/orthodb6>).<sup>b</sup> Unless otherwise specified, gene names are taken from the *A. mellifera* or *D. melanogaster* orthologs.<sup>c</sup> Maximum likelihood estimate across all sites and branches.<sup>d</sup> Tree length in synonymous substitutions per synonymous sites.
