# Supplementary material for: A depauperate immune repertoire precedes evolution of sociality in bees
Source: PubMed Central journal article supplement (PMC4408586; doi:10.1186/s13059-015-0628-y), 2015-04-24
Supplement: 13059_2015_628_MOESM4_ESM.pdf [file 13059_2015_628_MOESM4_ESM.pdf]

The 30 slowest evolving genes on the 4 taxa tree as determined by the M0 model

| OrthoDB group <sup>a</sup> | Gene <sup>b</sup>  | Classification                       | Global $\omega$ <sup>c</sup> | Tree Length <sup>d</sup> |
|----------------------------|--------------------|--------------------------------------|------------------------------|--------------------------|
| EOG60001Z                  | atg8               | Autophagy                            | 0.00010                      | 0.4288                   |
| EOG6XPNXB                  | basket             | c-Jun N-terminal kinases             | 0.00435                      | 0.5255                   |
| EOG6VX0M4                  | rm62-l             | Small RNA regulatory pathway members | 0.00691                      | 1.2326                   |
| EOG6GHX4B                  | CLIP-D10           | CLIP serine protease                 | 0.00845                      | 1.0736                   |
| EOG6WH726                  | atg6               | Autophagy                            | 0.01014                      | 0.6817                   |
| EOG6NVX17                  | argonaute-1        | Small RNA regulatory pathway members | 0.01077                      | 0.4826                   |
| EOG6PC86T                  | tor                | Autophagy                            | 0.01111                      | 0.7607                   |
| EOG6DR7V8                  | atg18              | Autophagy                            | 0.01356                      | 0.3759                   |
| EOG641NSQ                  | stat               | JAK/STAT pathway                     | 0.01621                      | 0.8793                   |
| EOG634TNR                  | pellino            | Toll pathway                         | 0.01657                      | 0.6012                   |
| EOG6J9KDP                  | Duox               | Peroxidase                           | 0.01738                      | 0.7475                   |
| EOG6W9GK1-2                | rm62-H             | Small RNA regulatory pathway members | 0.01879                      | 12.8089                  |
| EOG64B8HP                  | kayak              | c-Jun N-terminal kinases             | 0.01900                      | 0.5607                   |
| EOG6K3JCB                  | jra                | c-Jun N-terminal kinases             | 0.02014                      | 1.1542                   |
| EOG6931ZS-4                | TLR-8              | Toll receptor                        | 0.02026                      | 1.4883                   |
| EOG6GXD37                  | pasha              | Small RNA regulatory pathway members | 0.02037                      | 0.9185                   |
| EOG69W0XF                  | ran                | Small RNA regulatory pathway members | 0.02071                      | 0.8633                   |
| EOG6P8D0V                  | atg5               | Autophagy                            | 0.02194                      | 0.6426                   |
| EOG6KKWJ6                  | fmr1               | Small RNA regulatory pathway members | 0.02329                      | 0.3478                   |
| EOG6612K2                  | rm62-A             | Small RNA regulatory pathway members | 0.02393                      | 0.7787                   |
| EOG634TMW                  | ranbp-21           | Small RNA regulatory pathway members | 0.02405                      | 0.7290                   |
| EOG66DJHX-1                | dscam-like protein | Immunoglobulin                       | 0.02561                      | 23.4644                  |
| EOG6W9GK1-4                | rm62-J1            | Small RNA regulatory pathway members | 0.02738                      | 11.6353                  |
| EOG6W6MC0                  | Clect-GA3          | C-type lectin                        | 0.02812                      | 0.8423                   |
| EOG6931ZS-2                | TLR-10             | Toll receptor                        | 0.02863                      | 1.6222                   |
| EOG66WWRH-1                | Clect-GA1          | C-type lectin                        | 0.02995                      | 1.0848                   |
| EOG66T1GW                  | caspar             | IMD pathway                          | 0.03108                      | 0.6715                   |
| EOG6931ZS-1                | TLR-7              | Toll receptor                        | 0.03131                      | 0.9871                   |
| EOG6931ZS-3                | TLR-6              | Toll receptor                        | 0.03138                      | 0.7313                   |
| EOG6TTF0B                  | spatzle-6          | Spatzle                              | 0.03255                      | 0.8090                   |

<sup>a</sup> Group identifiers are from OrthoDB 6 (<http://cegg.unige.ch/orthodb6>).<sup>b</sup> Unless otherwise specified, gene names are taken from the *A. mellifera* or *D. melanogaster* orthologs.<sup>c</sup> Maximum likelihood estimate across all sites and branches.<sup>d</sup> Tree length in synonymous substitutions per synonymous sites.
