# Supplementary material for: A depauperate immune repertoire precedes evolution of sociality in bees
Source: PubMed Central journal article supplement (PMC4408586; doi:10.1186/s13059-015-0628-y), 2015-04-24
Supplement: 13059_2015_628_MOESM5_ESM.pdf [file 13059_2015_628_MOESM5_ESM.pdf]

The 30 fastest evolving genes on the 5 taxa tree as determined by the M0 model

| OrthoDB group <sup>a</sup> | Gene <sup>b</sup>      | Classification                       | Global $\omega$ <sup>c</sup> | Tree Length <sup>d</sup> |
|----------------------------|------------------------|--------------------------------------|------------------------------|--------------------------|
| EOG6TX97R                  | CLIP–D1–like protein   | CLIP serine protease                 | 0.30094                      | 2.2282                   |
| EOG6HDR8C                  | TLR–1                  | Toll receptor                        | 0.25801                      | 2.7466                   |
| EOG6RJDH9                  | scarface               | CLIP serine protease                 | 0.25097                      | 1.9614                   |
| EOG6RV16R–1                | BGRP–1                 | GGBP                                 | 0.24922                      | 2.1086                   |
| EOG66Q57J                  | LOC100642902 (B. terr) | Serine protease inhibitor            | 0.24741                      | 2.3151                   |
| EOG6RBP1C                  | persephone             | CLIP serine protease                 | 0.24712                      | 2.2103                   |
| EOG6QRFKP                  | CLIP–C1B               | CLIP serine protease                 | 0.24449                      | 2.3723                   |
| EOG6NCJV4                  | snake                  | CLIP serine protease                 | 0.23339                      | 1.6048                   |
| EOG6FJ6RD                  | CLIP–B13               | CLIP serine protease                 | 0.22864                      | 1.9741                   |
| EOG64QRG8                  | tak1                   | c–Jun N–terminal kinases             | 0.22180                      | 14.7534                  |
| EOG6KKWHX                  | argonaute–2            | Small RNA regulatory pathway members | 0.22158                      | 2.6678                   |
| EOG6XWDDG–3                | serpin–10B             | Serine protease inhibitor            | 0.20280                      | 3.0118                   |
| EOG6ZW3V0                  | fadd                   | IMD pathway                          | 0.20183                      | 2.3310                   |
| EOG6RJDHD                  | r2d2                   | Small RNA regulatory pathway members | 0.20087                      | 2.1837                   |
| EOG6HHMH6                  | serpin–23              | Scavenger receptor                   | 0.19767                      | 1.7375                   |
| EOG680GDM                  | eiger                  | c–Jun N–terminal kinases             | 0.19204                      | 2.7384                   |
| EOG6WDBSW                  | serpin–28D             | Serine protease inhibitor            | 0.19085                      | 2.1584                   |
| EOG6RV16R–2                | BGRP–2                 | GGBP                                 | 0.18544                      | 2.1662                   |
| EOG6N8PNJ                  | wengen                 | c–Jun N–terminal kinases             | 0.18343                      | 0.8607                   |
| EOG64J10C                  | ird5                   | IMD pathway                          | 0.18295                      | 1.6195                   |
| EOG66DJHQ                  | aubergine              | Small RNA regulatory pathway members | 0.17942                      | 2.4938                   |
| EOG6TDZ3C                  | defensin               | AMP                                  | 0.17525                      | 1.7331                   |
| EOG6TX97G                  | CLIP–D1                | CLIP serine protease                 | 0.17348                      | 2.7346                   |
| EOG6RBP1B                  | cactus                 | Toll pathway                         | 0.17196                      | 2.2317                   |
| EOG6W0VV6                  | SCR–B5                 | Scavenger receptor                   | 0.16861                      | 1.7944                   |
| EOG6FBG9K                  | npc2a                  | MD–2–related lipid recognition       | 0.16468                      | 1.8724                   |
| EOG6XWDDG–1                | serpin–10A             | Serine protease inhibitor            | 0.16206                      | 7.7541                   |
| EOG6NVX30                  | npc2b                  | MD–2–related lipid recognition       | 0.16092                      | 1.2163                   |
| EOG62BVQX                  | caspase–L1             | Caspase                              | 0.15962                      | 2.5414                   |
| EOG6X3FGJ                  | SCR–B6                 | Scavenger receptor                   | 0.15942                      | 2.0908                   |

<sup>a</sup> Group identifiers are from OrthoDB 6 (<http://cegg.unige.ch/orthodb6>).

<sup>b</sup> Unless otherwise specified, gene names are taken from the *A. mellifera* or *D. melanogaster* orthologs.

<sup>c</sup> Maximum likelihood estimate across all sites and branches.

<sup>d</sup> Tree length in synonymous substitutions per synonymous sites.
