# Supplementary material for: A depauperate immune repertoire precedes evolution of sociality in bees
Source: PubMed Central journal article supplement (PMC4408586; doi:10.1186/s13059-015-0628-y), 2015-04-24
Supplement: 13059_2015_628_MOESM6_ESM.pdf [file 13059_2015_628_MOESM6_ESM.pdf]

The 30 slowest evolving genes on the 5 taxa tree as determined by the M0 model

| OrthoDB group <sup>a</sup> | Gene <sup>b</sup>  | Classification                       | Global $\omega$ <sup>c</sup> | Tree Length <sup>d</sup> |
|----------------------------|--------------------|--------------------------------------|------------------------------|--------------------------|
| EOG6XPNXB                  | basket             | c-Jun N-terminal kinases             | 0.00469                      | 0.9624                   |
| EOG6VX0M4                  | rm62-I             | Small RNA regulatory pathway members | 0.00638                      | 1.8385                   |
| EOG69W0XF                  | ran                | Small RNA regulatory pathway members | 0.00899                      | 2.0558                   |
| EOG6PC86T                  | tor                | Autophagy                            | 0.00972                      | 1.8615                   |
| EOG6GHX4B                  | CLIP-D10           | CLIP serine protease                 | 0.01051                      | 1.5225                   |
| EOG634TNR                  | pellino            | Toll pathway                         | 0.01095                      | 1.3130                   |
| EOG6WH726                  | atg6               | Autophagy                            | 0.01267                      | 1.6741                   |
| EOG6J9KDP                  | Duox               | Peroxidase                           | 0.01440                      | 1.7390                   |
| EOG6W9GK1-2                | rm62-H             | Small RNA regulatory pathway members | 0.01533                      | 26.8464                  |
| EOG641NSQ                  | stat               | JAK/STAT pathway                     | 0.01591                      | 1.9244                   |
| EOG6K3JCB                  | jra                | c-Jun N-terminal kinases             | 0.01599                      | 1.9814                   |
| EOG6931ZS-4                | TLR-8              | Toll receptor                        | 0.01807                      | 2.0594                   |
| EOG6CRJF5                  | masquerade         | CLIP serine protease                 | 0.01809                      | 2.4697                   |
| EOG6NVX17                  | argonaute-1        | Small RNA regulatory pathway members | 0.01837                      | 1.1468                   |
| EOG6612K2                  | rm62-A             | Small RNA regulatory pathway members | 0.01941                      | 1.5797                   |
| EOG634TMW                  | ranbp-21           | Small RNA regulatory pathway members | 0.02043                      | 1.4494                   |
| EOG6W9GK1-3                | rm62-B1            | Small RNA regulatory pathway members | 0.02174                      | 12.2854                  |
| EOG60001Z                  | atg8               | Autophagy                            | 0.02379                      | 0.9714                   |
| EOG6X3FG7                  | tudor-SN           | Small RNA regulatory pathway members | 0.02586                      | 1.6953                   |
| EOG6P8D0V                  | atg5               | Autophagy                            | 0.02650                      | 1.7760                   |
| EOG6KKWJ6                  | fmr1               | Small RNA regulatory pathway members | 0.02706                      | 0.7046                   |
| EOG66WWRH-1                | Clect-GA1          | C-type lectin                        | 0.02727                      | 15.4043                  |
| EOG66DJHX-1                | dscam-like protein | Immunoglobulin                       | 0.02775                      | 39.7524                  |
| EOG6W9GK1-1                | rm62-J             | Small RNA regulatory pathway members | 0.02782                      | 14.5619                  |
| EOG6931ZS-1                | TLR-7              | Toll receptor                        | 0.02839                      | 1.6509                   |
| EOG64B8HP                  | kayak              | c-Jun N-terminal kinases             | 0.02866                      | 1.1186                   |
| EOG6K6DKF                  | cactin             | Toll pathway                         | 0.03088                      | 2.3047                   |
| EOG6KD521                  | chorion peroxidase | Peroxidase                           | 0.03149                      | 16.4281                  |
| EOG6DR7V8                  | atg18              | Autophagy                            | 0.03276                      | 1.0310                   |
| EOG6TTF0B                  | spatzle-6          | Spatzle                              | 0.03401                      | 1.7632                   |

<sup>a</sup> Group identifiers are from OrthoDB 6 (<http://cegg.unige.ch/orthodb6>).<sup>b</sup> Unless otherwise specified, gene names are taken from the *A. mellifera* or *D. melanogaster* orthologs.<sup>c</sup> Maximum likelihood estimate across all sites and branches.<sup>d</sup> Tree length in synonymous substitutions per synonymous sites.
