# Supplementary material for: A depauperate immune repertoire precedes evolution of sociality in bees
Source: PubMed Central journal article supplement (PMC4408586; doi:10.1186/s13059-015-0628-y), 2015-04-24
Supplement: 13059_2015_628_MOESM7_ESM.pdf [file 13059_2015_628_MOESM7_ESM.pdf]

| OrthoDB Group <sup>a</sup> | Gene <sup>b</sup>      | Classification                       | Sites <sup>c</sup> | <i>p</i> -value <sup>d</sup> | <i>q</i> -value <sup>e</sup> | Positively selected sites <sup>f</sup>                                                                                                                                                                                                                                                                                                                                                                                                                                                                                                                                                                                                                                                                                                                                                                                                                                                                                                                                                                                                                                                                                                                                                                                                                                                                                                                                                                                                      |
|----------------------------|------------------------|--------------------------------------|--------------------|------------------------------|------------------------------|---------------------------------------------------------------------------------------------------------------------------------------------------------------------------------------------------------------------------------------------------------------------------------------------------------------------------------------------------------------------------------------------------------------------------------------------------------------------------------------------------------------------------------------------------------------------------------------------------------------------------------------------------------------------------------------------------------------------------------------------------------------------------------------------------------------------------------------------------------------------------------------------------------------------------------------------------------------------------------------------------------------------------------------------------------------------------------------------------------------------------------------------------------------------------------------------------------------------------------------------------------------------------------------------------------------------------------------------------------------------------------------------------------------------------------------------|
| EOG6KD521                  | chorion peroxidase     | Peroxidase                           | 352                | 0.00003                      | 0.00065                      | 21A, <b>60S</b> , 125L, 127L, 128T, <b>133L</b> , <b>135A</b> , <b>137E</b> ,<br>138H, 140R, 141I, 146I, 148I, <b>152W</b> , <b>153D</b> , <b>154D</b> ,<br><b>155E</b> , <b>158Q</b> , <b>160A</b> , <b>161R</b> , <b>163I</b> , 164V, 166A, 169Q,<br><b>170H</b> , <b>171I</b> , 176F, <b>178P</b> , <b>179I</b> , 183S, <b>185I</b> , <b>186D</b> ,<br>187A, <b>188F</b> , <b>189A</b> , 191A, 192A, <b>195F</b> , <b>196G</b> , 199L,<br>200L, <b>203A</b> , <b>204V</b> , 206R, <b>207W</b> , <b>209K</b> , <b>210A</b> , <b>212K</b> ,<br><b>213F</b> , 215A, 216S, <b>217K</b> , 218R, <b>219L</b> , <b>220S</b> , 222L,<br>223I, <b>225R</b> , <b>227F</b> , <b>228D</b> , 229L, <b>230Y</b> , 231R, <b>232A</b> ,<br><b>233G</b> , <b>234V</b> , <b>236D</b> , <b>238Y</b> , 240M, <b>241G</b> , <b>243M</b> , <b>244N</b> ,<br>247A, <b>248Q</b> , 249A, 250M, <b>252D</b> , <b>253S</b> , <b>255T</b> , 256Q,<br><b>259T</b> , 260N, <b>263F</b> , <b>264K</b> , <b>267G</b> , <b>269K</b> , <b>270F</b> , <b>271G</b> ,<br>272L, 274L, 275V, <b>276S</b> , <b>279M</b> , 281R, <b>282G</b> , <b>286P</b> ,<br>290I, <b>293Y</b> , <b>296I</b> , 297F, 298E, 299H, 305L, <b>306W</b> ,<br>308P, <b>310P</b> , 314R, <b>318A</b> , <b>319R</b> , <b>320V</b> , <b>323D</b> , <b>324N</b> ,<br>327L, <b>328I</b> , <b>329D</b> , <b>330T</b> , <b>336M</b> , 339P, <b>341H</b> , <b>349C</b> ,<br><b>350R</b> , <b>351S</b> , 352G |
| EOG6XWDDG-1                | serpin-10A             | Serine protease inhibitor            | 375                | 0.00014                      | 0.00183                      | 2S, 3A, <b>6N</b> , 8E, 9N, 14L, 15S, 19N, 23R, 25L, 26Y,<br>31S, <b>40S</b> , 42L, <b>46M</b> , 49S, 50H, 51L, 55A, <b>56E</b> , <b>57S</b> ,<br><b>60L</b> , <b>62E</b> , 64T, 70Y, 74L, 78E, <b>81S</b> , 83I, <b>86L</b> , 92V,<br>94L, 95Y, 96I, 99A, 101Y, 103Q, 105G, <b>106F</b> , 109L,<br><b>111E</b> , 112F, 116Q, <b>117S</b> , 119I, <b>120S</b> , 121K, 125K,<br>128V, 133K, 136A, 141K, 145K, <b>152S</b> , 156N, 172T,<br>176I, 179I, 180R, 185R, 192N, <b>194T</b> , <b>195K</b> , 196L,<br>199T, 201Y, 202S, <b>204S</b> , 211M, 212P, 217K, 218F,<br>221I, 226P, 231I, 235N, 236Q, 239G, 243L, 244Q,<br>245T, 246N, <b>247F</b> , 251M, 253A, 256T, 257R, 259Y,<br>260N, 264L, <b>265Y</b> , 269F, <b>273F</b> , 274T, <b>276D</b> , 286L,<br>288T, 290F, 294A, 297N, 298R, 300S, 305M, 310L,<br><b>312K</b> , 314I, 323E, <b>330R</b> , <b>332R</b> , 338E, 341E, 349M,<br>351I, 353E, 358N, 359I, 360P, 366V, 368V, 375L                                                                                                                                                                                                                                                                                                                                                                                                                                                                                               |
| EOG634TMX                  | dicer-2                | Small RNA regulatory pathway members | 1269               | 0.00090                      | 0.00793                      | 7E, 22C, 23K, 59G, 86S, 95G, 133N, 134R, 161N,<br>225D, 232N, 233N, 244L, 248E, <b>256D</b> , 310H, 410N,<br>454S, 458Q, 461C, 531S, 555G, 617W, 632Y, 660T,<br>707E, 756K, 765N, 766N, 913S, 938A, 1011R, 1039F,<br>1052Y, 1176N, 1181V, 1182V, 1220K                                                                                                                                                                                                                                                                                                                                                                                                                                                                                                                                                                                                                                                                                                                                                                                                                                                                                                                                                                                                                                                                                                                                                                                      |
| EOG66Q57J                  | LOC100642902 (B. terr) | Serine protease inhibitor            | 1189               | 0.00000                      | 0.00000                      | 143V, 154S, 215Y, 239K, 251E, 261E, 275D, 292P,<br>322Y, 334K, 370T, 382E, 410I, 443H, 469P, 496S,<br>564N, 571S, 593D, 596Y, 604S, 619V, 631D, 668D,<br>675K, 676T, 686S, 687M, 716E, 735S, 742S, 745T,<br>748N, 796S                                                                                                                                                                                                                                                                                                                                                                                                                                                                                                                                                                                                                                                                                                                                                                                                                                                                                                                                                                                                                                                                                                                                                                                                                      |
| EOG6FN2ZK                  | hopscotch              | JAK/STAT pathway                     | 600                | 0.00000                      | 0.00000                      | 6L, 20L, 68M, <b>354D</b> , <b>356C</b> , <b>360G</b> , 361K, <b>365P</b> , 366P,<br>488F, 489E, 507S, 532T, 536Y, 586R, 587L, 588Q,<br>591Q, <b>594G</b> , <b>595S</b> , <b>597E</b> , <b>598L</b> , <b>599L</b>                                                                                                                                                                                                                                                                                                                                                                                                                                                                                                                                                                                                                                                                                                                                                                                                                                                                                                                                                                                                                                                                                                                                                                                                                           |
| EOG6Q2BWQ                  | IAP-2                  | IAP repeat                           | 503                | 0.00000                      | 0.00011                      | 114K, 157E, 198N, <b>202N</b> , 204S, <b>440E</b> , 441T, 443L,<br>444E, <b>449K</b> , <b>460M</b> , 479Y, <b>483S</b> , 484L, 486Y, <b>493E</b> ,<br>495K, 496A                                                                                                                                                                                                                                                                                                                                                                                                                                                                                                                                                                                                                                                                                                                                                                                                                                                                                                                                                                                                                                                                                                                                                                                                                                                                            |
| EOG608KPT                  | LOC100642932 (B. terr) | Scavenger receptor                   | 1646               | 0.00000                      | 0.00001                      | 74N, 249N, 254P, 332K, 347S, 378Y, 381G, 401F,<br>431L, 538K, 584S, 650N, 954D, 963S, 1142K, 1292N,<br>1600G                                                                                                                                                                                                                                                                                                                                                                                                                                                                                                                                                                                                                                                                                                                                                                                                                                                                                                                                                                                                                                                                                                                                                                                                                                                                                                                                |
| EOG666T1W                  | domeless               | JAK/STAT pathway                     | 1435               | 0.00390                      | 0.02112                      | 12Q, 21K, 43V, 45R, 227L, 252Y, 298K, 324N, 494S,<br>496V, 1183I, 1309V, 1337G                                                                                                                                                                                                                                                                                                                                                                                                                                                                                                                                                                                                                                                                                                                                                                                                                                                                                                                                                                                                                                                                                                                                                                                                                                                                                                                                                              |
| EOG68W9HQ                  | Clect-8                | C-type lectin                        | 220                | 0.00006                      | 0.00098                      | <b>177E</b> , 180S, 181S, <b>183P</b> , <b>185S</b> , 188Q, <b>189Q</b> , 204T,<br>207E, 213Y, <b>216K</b> , <b>220N</b>                                                                                                                                                                                                                                                                                                                                                                                                                                                                                                                                                                                                                                                                                                                                                                                                                                                                                                                                                                                                                                                                                                                                                                                                                                                                                                                    |
| EOG6J3TZ2                  | cardinal               | Peroxidase                           | 1186               | 0.00011                      | 0.00171                      | 69V, 330K, 416S, 477S, 672G, 799K, 850R, 861N,<br>920N, 1072E, 1161S, 1186S                                                                                                                                                                                                                                                                                                                                                                                                                                                                                                                                                                                                                                                                                                                                                                                                                                                                                                                                                                                                                                                                                                                                                                                                                                                                                                                                                                 |
| EOG6X0K8Q                  | myd88                  | Toll pathway                         | 209                | 0.00334                      | 0.01961                      | <b>1P</b> , 32E, 36K, 39T, 85N, <b>86E</b> , 87M, 142K, 146N,<br>175Q, <b>200S</b>                                                                                                                                                                                                                                                                                                                                                                                                                                                                                                                                                                                                                                                                                                                                                                                                                                                                                                                                                                                                                                                                                                                                                                                                                                                                                                                                                          |
| EOG6QRFJX                  | draper                 | Nimrod                               | 600                | 0.00733                      | 0.03042                      | <b>2Q</b> , <b>3E</b> , 133L, 217E, 227S, 296I, 325W, 330T, 336E,<br>346W                                                                                                                                                                                                                                                                                                                                                                                                                                                                                                                                                                                                                                                                                                                                                                                                                                                                                                                                                                                                                                                                                                                                                                                                                                                                                                                                                                   |
| EOG64J10C                  | ird5                   | IMD pathway                          | 343                | 0.00840                      | 0.03383                      | 1G, 41E, 46S, 142Q, 146G, 153N, 182S, 214Y, 285Y                                                                                                                                                                                                                                                                                                                                                                                                                                                                                                                                                                                                                                                                                                                                                                                                                                                                                                                                                                                                                                                                                                                                                                                                                                                                                                                                                                                            |
| EOG6FBG9K                  | npc2a                  | MD-2-related lipid recognition       | 138                | 0.00327                      | 0.01961                      | 3I, 6I, <b>10C</b> , 14P, 25T, 82Q, 85D, <b>113S</b> , 127D                                                                                                                                                                                                                                                                                                                                                                                                                                                                                                                                                                                                                                                                                                                                                                                                                                                                                                                                                                                                                                                                                                                                                                                                                                                                                                                                                                                 |
| EOG659ZWS                  | relish                 | Relish                               | 609                | 0.00086                      | 0.00793                      | <b>23S</b> , 167C, 178N, 181K, 342A, 452S, 461S, 552H                                                                                                                                                                                                                                                                                                                                                                                                                                                                                                                                                                                                                                                                                                                                                                                                                                                                                                                                                                                                                                                                                                                                                                                                                                                                                                                                                                                       |
| EOG62547K                  | armitage               | Small RNA regulatory pathway members | 996                | 0.00119                      | 0.00984                      | 5F, 143E, 415Q, 451S, 493I, 512I, 985G                                                                                                                                                                                                                                                                                                                                                                                                                                                                                                                                                                                                                                                                                                                                                                                                                                                                                                                                                                                                                                                                                                                                                                                                                                                                                                                                                                                                      |
| EOG6R7SS0                  | CLIP-D3                | CLIP serine protease                 | 298                | 0.00068                      | 0.00688                      | 7S, 14Q, 19K, <b>20E</b> , <b>92E</b> , 120H                                                                                                                                                                                                                                                                                                                                                                                                                                                                                                                                                                                                                                                                                                                                                                                                                                                                                                                                                                                                                                                                                                                                                                                                                                                                                                                                                                                                |
| EOG6X3FGJ                  | SCR-B6                 | Scavenger receptor                   | 438                | 0.00506                      | 0.02378                      | 106A, 195S, 196Y, 264I, 298K, 354V                                                                                                                                                                                                                                                                                                                                                                                                                                                                                                                                                                                                                                                                                                                                                                                                                                                                                                                                                                                                                                                                                                                                                                                                                                                                                                                                                                                                          |
| EOG6TTF0B                  | spatzle-6              | Spaetzle                             | 385                | 0.00421                      | 0.02197                      | 21V, 152S, <b>153D</b> , <b>154S</b> , 157L, 381S                                                                                                                                                                                                                                                                                                                                                                                                                                                                                                                                                                                                                                                                                                                                                                                                                                                                                                                                                                                                                                                                                                                                                                                                                                                                                                                                                                                           |
| EOG66DJHQ                  | aubergine              | Small RNA regulatory pathway members | 644                | 0.00012                      | 0.00171                      | 25E, 325R, 353P, 627D, <b>633M</b> , 634Y                                                                                                                                                                                                                                                                                                                                                                                                                                                                                                                                                                                                                                                                                                                                                                                                                                                                                                                                                                                                                                                                                                                                                                                                                                                                                                                                                                                                   |
| EOG6C2FSC                  | atg1                   | Autophagy                            | 471                | 0.00165                      | 0.01290                      | 65R, 81H, 217C, 283M, 285A                                                                                                                                                                                                                                                                                                                                                                                                                                                                                                                                                                                                                                                                                                                                                                                                                                                                                                                                                                                                                                                                                                                                                                                                                                                                                                                                                                                                                  |
| EOG6RBP1C                  | persephone             | CLIP serine protease                 | 288                | 0.00255                      | 0.01826                      | 79I, 167A, 169N, 192V, 195P                                                                                                                                                                                                                                                                                                                                                                                                                                                                                                                                                                                                                                                                                                                                                                                                                                                                                                                                                                                                                                                                                                                                                                                                                                                                                                                                                                                                                 |
| EOG6DFN3J                  | PPO-6                  | Prophenol oxidase                    | 672                | 0.00547                      | 0.02410                      | <b>173E</b> , 226N, 375I, 421Q, <b>568G</b>                                                                                                                                                                                                                                                                                                                                                                                                                                                                                                                                                                                                                                                                                                                                                                                                                                                                                                                                                                                                                                                                                                                                                                                                                                                                                                                                                                                                 |
| EOG6X0K76                  | tep3                   | Thioester-containing protein         | 301                | 0.00060                      | 0.00653                      | <b>1P</b> , 9F, 10T, 13S, 127E                                                                                                                                                                                                                                                                                                                                                                                                                                                                                                                                                                                                                                                                                                                                                                                                                                                                                                                                                                                                                                                                                                                                                                                                                                                                                                                                                                                                              |
| EOG680GDM                  | eiger                  | c-Jun N-terminal kinases             | 334                | 0.01119                      | 0.04283                      | 101L, 130K, 140N, 157S                                                                                                                                                                                                                                                                                                                                                                                                                                                                                                                                                                                                                                                                                                                                                                                                                                                                                                                                                                                                                                                                                                                                                                                                                                                                                                                                                                                                                      |
| EOG6N8PNJ                  | wengen                 | c-Jun N-terminal kinases             | 211                | 0.00020                      | 0.00229                      | 146S, <b>198E</b> , <b>206N</b> , 208I                                                                                                                                                                                                                                                                                                                                                                                                                                                                                                                                                                                                                                                                                                                                                                                                                                                                                                                                                                                                                                                                                                                                                                                                                                                                                                                                                                                                      |
| EOG6866VT                  | tube                   | Toll pathway                         | 88                 | 0.01124                      | 0.04283                      | 25Q, 79Y, <b>82V</b> , 88F                                                                                                                                                                                                                                                                                                                                                                                                                                                                                                                                                                                                                                                                                                                                                                                                                                                                                                                                                                                                                                                                                                                                                                                                                                                                                                                                                                                                                  |
| EOG61VHHT                  | Clect-SE1              | C-type lectin                        | 852                | 0.00528                      | 0.02402                      | 30S, 35C, 86Y                                                                                                                                                                                                                                                                                                                                                                                                                                                                                                                                                                                                                                                                                                                                                                                                                                                                                                                                                                                                                                                                                                                                                                                                                                                                                                                                                                                                                               |
| EOG679CP4                  | POSH                   | IMD pathway                          | 852                | 0.00289                      | 0.01850                      | 310Q, <b>311N</b> , 574Y                                                                                                                                                                                                                                                                                                                                                                                                                                                                                                                                                                                                                                                                                                                                                                                                                                                                                                                                                                                                                                                                                                                                                                                                                                                                                                                                                                                                                    |
| EOG62Z354                  | argonaute-3            | Small RNA regulatory pathway members | 743                | 0.00371                      | 0.02094                      | 81E, 130Q, 395G                                                                                                                                                                                                                                                                                                                                                                                                                                                                                                                                                                                                                                                                                                                                                                                                                                                                                                                                                                                                                                                                                                                                                                                                                                                                                                                                                                                                                             |
| EOG6WH726                  | atg6                   | Autophagy                            | 430                | 0.00259                      | 0.01826                      | <b>11A</b> , 26Y                                                                                                                                                                                                                                                                                                                                                                                                                                                                                                                                                                                                                                                                                                                                                                                                                                                                                                                                                                                                                                                                                                                                                                                                                                                                                                                                                                                                                            |
| EOG6NCJV4                  | snake                  | CLIP serine protease                 | 399                | 0.00496                      | 0.02378                      | 66V, 78I                                                                                                                                                                                                                                                                                                                                                                                                                                                                                                                                                                                                                                                                                                                                                                                                                                                                                                                                                                                                                                                                                                                                                                                                                                                                                                                                                                                                                                    |
| EOG6TX97R                  | CLIP-D1-like protein   | CLIP serine protease                 | 312                | 0.00278                      | 0.01850                      | 23C, 59Q                                                                                                                                                                                                                                                                                                                                                                                                                                                                                                                                                                                                                                                                                                                                                                                                                                                                                                                                                                                                                                                                                                                                                                                                                                                                                                                                                                                                                                    |
| EOG6RV16R-2                | BGRP-2                 | GNBP                                 | 234                | 0.00472                      | 0.02377                      | 123R, 224K                                                                                                                                                                                                                                                                                                                                                                                                                                                                                                                                                                                                                                                                                                                                                                                                                                                                                                                                                                                                                                                                                                                                                                                                                                                                                                                                                                                                                                  |
| EOG64QRG8                  | tak1                   | c-Jun N-terminal kinases             | 150                | 0.00704                      | 0.03006                      | 43L, 44D                                                                                                                                                                                                                                                                                                                                                                                                                                                                                                                                                                                                                                                                                                                                                                                                                                                                                                                                                                                                                                                                                                                                                                                                                                                                                                                                                                                                                                    |
| EOG66DJHX-1                | dscam-like protein     | Immunoglobulin                       | 1495               | 0.00000                      | 0.00000                      | None                                                                                                                                                                                                                                                                                                                                                                                                                                                                                                                                                                                                                                                                                                                                                                                                                                                                                                                                                                                                                                                                                                                                                                                                                                                                                                                                                                                                                                        |
| EOG66DJHX-2                | dscam                  | Immunoglobulin                       | 489                | 0.00000                      | 0.00000                      | None                                                                                                                                                                                                                                                                                                                                                                                                                                                                                                                                                                                                                                                                                                                                                                                                                                                                                                                                                                                                                                                                                                                                                                                                                                                                                                                                                                                                                                        |

<sup>a</sup> Group identifiers are from OrthoDB 6 (<http://cegg.unige.ch/orthodb6>).<sup>b</sup> Unless otherwise specified, gene names are taken from the *A. mellifera* or *D. melanogaster* orthologs.<sup>c</sup> Total number of codons in the alignment after trimming with Gblocks.<sup>d</sup> From LRT comparing Branch-site model A to a constrained version with  $\omega_2 = 1$ .<sup>e</sup> Multiple test correction by the method of Benjamini and Hochberg to control the false discovery rate.<sup>f</sup> Sites are classified as under positive selection if the Bayesian posterior probability > 0.75 (> 0.95 in bold).Reference sequence taken from *A. mellifera*
