# Supplementary material for: A depauperate immune repertoire precedes evolution of sociality in bees
Source: PubMed Central journal article supplement (PMC4408586; doi:10.1186/s13059-015-0628-y), 2015-04-24
Supplement: 13059_2015_628_MOESM8_ESM.pdf [file 13059_2015_628_MOESM8_ESM.pdf]

| OrthoDB Group <sup>a</sup> | Gene <sup>b</sup>      | Classification                       | Sites <sup>c</sup> | p-value <sup>d</sup> | q-value <sup>e</sup> | Proportion <sup>f</sup> |
|----------------------------|------------------------|--------------------------------------|--------------------|----------------------|----------------------|-------------------------|
| EOG6KKWJ6                  | fmr1                   | Small RNA regulatory pathway members | 377                | 0.02746              | 0.04681              | 1.00000                 |
| EOG634TN0                  | droscha                | Small RNA regulatory pathway members | 1304               | 0.00911              | 0.01898              | 0.92316                 |
| EOG6Q2BWQ                  | IAP-2                  | IAP repeat                           | 515                | 0.00082              | 0.00257              | 0.89698                 |
| EOG6W9GKN                  | atg7                   | Autophagy                            | 668                | 0.02481              | 0.04278              | 0.81241                 |
| EOG680GC4                  | CLIP-D9                | CLIP serine protease                 | 503                | 0.02967              | 0.04838              | 0.78231                 |
| EOG6CNP6K-1                | SCR-B3                 | Scavenger receptor                   | 569                | 0.02200              | 0.03838              | 0.75704                 |
| EOG6J3TZ2                  | cardinal               | Peroxidase                           | 1203               | 0.00000              | 0.00000              | 0.61809                 |
| EOG6VX0M3                  | ark                    | Caspase                              | 1263               | 0.00001              | 0.00005              | 0.55688                 |
| EOG69CNQ4-1                | IAP-1A                 | IAP repeat                           | 401                | 0.00000              | 0.00002              | 0.50305                 |
| EOG6XKSQD                  | peroxiredoxin-1        | Peroxidase                           | 208                | 0.00028              | 0.00115              | 0.49032                 |
| EOG6FBG95                  | Clect-10               | C-type lectin                        | 159                | 0.00214              | 0.00554              | 0.41115                 |
| EOG62Z354                  | argonaute-3            | Small RNA regulatory pathway members | 814                | 0.00000              | 0.00000              | 0.40856                 |
| EOG6RBP1B                  | cactus                 | Toll pathway                         | 357                | 0.01524              | 0.02874              | 0.40496                 |
| EOG66DJHX-1                | dscam-like protein     | Immunoglobulin                       | 1847               | 0.00013              | 0.00063              | 0.38471                 |
| EOG6BG79T                  | spindle-E              | Small RNA regulatory pathway members | 1273               | 0.00000              | 0.00000              | 0.35075                 |
| EOG6RBP1C                  | persephone             | CLIP serine protease                 | 293                | 0.00004              | 0.00021              | 0.34524                 |
| EOG6CNP6K-2                | SCR-B9                 | Scavenger receptor                   | 387                | 0.00034              | 0.00139              | 0.29157                 |
| EOG6QRFKP                  | CLIP-C1B               | CLIP serine protease                 | 350                | 0.00381              | 0.00908              | 0.26999                 |
| EOG6XWDCW                  | rm62-C                 | Small RNA regulatory pathway members | 526                | 0.00000              | 0.00000              | 0.25556                 |
| EOG6VDNFR                  | dorsal                 | Relish                               | 476                | 0.00000              | 0.00000              | 0.25203                 |
| EOG6RJDHD                  | r2d2                   | Small RNA regulatory pathway members | 325                | 0.00360              | 0.00870              | 0.24607                 |
| EOG66DJHQ                  | aubergine              | Small RNA regulatory pathway members | 787                | 0.00000              | 0.00000              | 0.24311                 |
| EOG6XWDDG-2                | serpin-9               | Serine protease inhibitor            | 365                | 0.00000              | 0.00002              | 0.24101                 |
| EOG6TDZ3C                  | defensin               | AMP                                  | 93                 | 0.02861              | 0.04775              | 0.23445                 |
| EOG6ZPC96                  | nimrod-C2              | Nimrod                               | 1802               | 0.00000              | 0.00000              | 0.22238                 |
| EOG6QNKCB                  | spatzle-1B             | Spaetzle                             | 169                | 0.00002              | 0.00011              | 0.21683                 |
| EOG6D2556                  | atg4A                  | Autophagy                            | 482                | 0.00000              | 0.00004              | 0.21463                 |
| EOG6X3FG7                  | tudor-SN               | Small RNA regulatory pathway members | 872                | 0.00008              | 0.00042              | 0.16680                 |
| EOG6VX0M1-2                | DBLOX-like protein     | Peroxidase                           | 699                | 0.00001              | 0.00009              | 0.16364                 |
| EOG666T1W                  | domeless               | JAK/STAT pathway                     | 1490               | 0.00010              | 0.00048              | 0.16255                 |
| EOG6X3FGJ                  | SCR-B6                 | Scavenger receptor                   | 437                | 0.00057              | 0.00197              | 0.15961                 |
| EOG6RV16R-2                | BGRP-2                 | GNBP                                 | 322                | 0.01280              | 0.02526              | 0.15850                 |
| EOG61ZCRN                  | IAP-6                  | IAP repeat                           | 3255               | 0.00000              | 0.00000              | 0.15842                 |
| EOG6FJ6RD                  | CLIP-B13               | CLIP serine protease                 | 355                | 0.00082              | 0.00257              | 0.13351                 |
| EOG6FN2ZK                  | hopscotch              | JAK/STAT pathway                     | 1088               | 0.00002              | 0.00009              | 0.13244                 |
| EOG6XWDDG-3                | serpin-10B             | Serine protease inhibitor            | 307                | 0.00047              | 0.00172              | 0.12278                 |
| EOG62547K                  | armitage               | Small RNA regulatory pathway members | 1054               | 0.02865              | 0.04775              | 0.11909                 |
| EOG634TMX                  | dicer-2                | Small RNA regulatory pathway members | 1334               | 0.00004              | 0.00023              | 0.11437                 |
| EOG6W9GK1-1                | rm62-J                 | Small RNA regulatory pathway members | 708                | 0.00038              | 0.00149              | 0.11130                 |
| EOG64F4RN                  | traf6                  | Toll pathway                         | 409                | 0.02043              | 0.03649              | 0.10458                 |
| EOG6ZCRKS                  | loquacious             | Small RNA regulatory pathway members | 332                | 0.00001              | 0.00008              | 0.09908                 |
| EOG659ZWS                  | relish                 | Relish                               | 613                | 0.00066              | 0.00226              | 0.09857                 |
| EOG693216-1                | peroxiredoxin-4        | Peroxidase                           | 220                | 0.00043              | 0.00160              | 0.09726                 |
| EOG6866VT                  | tube                   | Toll pathway                         | 298                | 0.00110              | 0.00309              | 0.09416                 |
| EOG6TX97R                  | CLIP-D1-like protein   | CLIP serine protease                 | 320                | 0.00050              | 0.00179              | 0.08981                 |
| EOG60GB73-1                | PHGPx2B                | Peroxidase                           | 198                | 0.00204              | 0.00536              | 0.08765                 |
| EOG6T1G2P                  | pelle                  | Toll pathway                         | 414                | 0.00000              | 0.00002              | 0.08323                 |
| EOG6BG7B9                  | snmp1                  | Scavenger receptor                   | 484                | 0.00111              | 0.00309              | 0.08052                 |
| EOG68SF83                  | tep23                  | Thioester-containing protein         | 1694               | 0.00000              | 0.00000              | 0.07874                 |
| EOG62BVQX                  | caspase-L1             | Caspase                              | 396                | 0.00448              | 0.01003              | 0.07823                 |
| EOG6612K2                  | rm62-A                 | Small RNA regulatory pathway members | 725                | 0.01434              | 0.02793              | 0.07771                 |
| EOG6ZCRN2                  | IAP-5                  | IAP repeat                           | 145                | 0.02947              | 0.04838              | 0.07768                 |
| EOG6QRFJX                  | draper                 | Nimrod                               | 945                | 0.00107              | 0.00309              | 0.07296                 |
| EOG6MGQPH                  | atg16L                 | Autophagy                            | 160                | 0.00000              | 0.00000              | 0.05986                 |
| EOG6KWH93                  | vig                    | Small RNA regulatory pathway members | 411                | 0.00641              | 0.01373              | 0.05947                 |
| EOG66DJHX-2                | dscam                  | Immunoglobulin                       | 777                | 0.00000              | 0.00000              | 0.05396                 |
| EOG6D254M                  | SCR-AC1                | Scavenger receptor                   | 2816               | 0.00000              | 0.00000              | 0.05324                 |
| EOG61NS2P                  | CLIP-A5                | CLIP serine protease                 | 308                | 0.00007              | 0.00037              | 0.05321                 |
| EOG6WDBSW                  | serpin-28D             | Serine protease inhibitor            | 601                | 0.02155              | 0.03802              | 0.04934                 |
| EOG66Q57J                  | LOC100642902 (B. terr) | Serine protease inhibitor            | 1327               | 0.00014              | 0.00063              | 0.04831                 |
| EOG6PRR5Q                  | CLIP-A30               | CLIP serine protease                 | 875                | 0.00000              | 0.00003              | 0.04632                 |
| EOG6XWDDG-1                | serpin-10A             | Serine protease inhibitor            | 385                | 0.00419              | 0.00982              | 0.04073                 |
| EOG6VX0M1-1                | DBLOX                  | Peroxidase                           | 944                | 0.00630              | 0.01369              | 0.04017                 |
| EOG6J6Q5V                  | peroxidasin            | Peroxidase                           | 1100               | 0.00284              | 0.00704              | 0.03994                 |
| EOG6RJDH9                  | scarface               | CLIP serine protease                 | 622                | 0.00019              | 0.00083              | 0.03490                 |
| EOG6X0K8Q                  | myd88                  | Toll pathway                         | 275                | 0.00000              | 0.00000              | 0.03275                 |
| EOG6ZPC9T                  | rm62-F                 | Small RNA regulatory pathway members | 546                | 0.01087              | 0.02202              | 0.03193                 |
| EOG6VX0M4                  | rm62-I                 | Small RNA regulatory pathway members | 713                | 0.00432              | 0.00982              | 0.03051                 |
| EOG6JSXPT                  | abaecin                | AMP                                  | 46                 | 0.00591              | 0.01303              | 0.02894                 |
| EOG6KKWHX                  | argonaute-2            | Small RNA regulatory pathway members | 896                | 0.00000              | 0.00000              | 0.02857                 |
| EOG6TTDZQ                  | dicer-1                | Small RNA regulatory pathway members | 1908               | 0.00120              | 0.00326              | 0.01967                 |
| EOG608KPT                  | LOC100642932 (B. terr) | Scavenger receptor                   | 1893               | 0.00103              | 0.00304              | 0.01939                 |
| EOG61VHHT                  | Clect-SE1              | C-type lectin                        | 1095               | 0.00041              | 0.00158              | 0.01936                 |
| EOG69CNQ4-2                | IAP-1B                 | IAP repeat                           | 346                | 0.00709              | 0.01498              | 0.01823                 |
| EOG634TN8                  | croquemort             | Scavenger receptor                   | 487                | 0.00001              | 0.00008              | 0.01679                 |
| EOG6C2FSC                  | atg1                   | Autophagy                            | 476                | 0.00092              | 0.00277              | 0.01352                 |
| EOG6W9GK1-3                | rm62-B1                | Small RNA regulatory pathway members | 431                | 0.00080              | 0.00257              | 0.01244                 |
| EOG6X0K76                  | tep3                   | Thioester-containing protein         | 1379               | 0.00927              | 0.01904              | 0.01054                 |
| EOG6HDR8C                  | TLR-1                  | Toll receptor                        | 496                | 0.00428              | 0.00982              | 0.01047                 |
| EOG64J10C                  | ird5                   | IMD pathway                          | 560                | 0.00148              | 0.00395              | 0.00921                 |
| EOG6RV16R-1                | BGRP-1                 | GNBP                                 | 457                | 0.00016              | 0.00072              | 0.00850                 |
| EOG6KD521                  | chorion peroxidase     | Peroxidase                           | 482                | 0.00086              | 0.00264              | 0.00770                 |
| EOG6W3R35                  | belle                  | Small RNA regulatory pathway members | 683                | 0.01168              | 0.02335              | 0.00701                 |
| EOG6HHMH6                  | serpin-23              | Scavenger receptor                   | 2066               | 0.00008              | 0.00041              | 0.00664                 |
| EOG6JQ2CF                  | LOC100642575 (B. terr) | Scavenger receptor                   | 924                | 0.01621              | 0.02966              | 0.00648                 |
| EOG6931ZS-1                | TLR-7                  | Toll receptor                        | 1344               | 0.00255              | 0.00647              | 0.00507                 |
| EOG6DFN3J                  | PPO-6                  | Prophenol oxidase                    | 673                | 0.01621              | 0.02966              | 0.00495                 |
| EOG634TNR                  | pellino                | Toll pathway                         | 431                | 0.00078              | 0.00257              | 0.00483                 |
| EOG679CP4                  | POSH                   | IMD pathway                          | 866                | 0.01504              | 0.02874              | 0.00461                 |
| EOG6N8PNJ                  | wengen                 | c-Jun N-terminal kinases             | 293                | 0.01533              | 0.02874              | 0.00449                 |
| EOG641NSQ                  | stat                   | JAK/STAT pathway                     | 774                | 0.00286              | 0.00704              | 0.00283                 |
| EOG6N5TBN                  | galectin-3             | Galectin                             | 1290               | 0.01847              | 0.03338              | 0.00158                 |

<sup>a</sup> Group identifiers are from OrthoDB 6 (<http://cegg.unige.ch/orthodb6>).<sup>b</sup> Unless otherwise specified, gene names are taken from the *A. mellifera* or *D. melanogaster* orthologs.<sup>c</sup> Total number of codons in the alignment after trimming with Gblocks.<sup>d</sup> From LRT comparing Clade model D to M3 with 3 rate categories.<sup>e</sup> Multiple test correction by the method of Benjamini and Hochberg to control the false discovery rate.<sup>f</sup> Maximum likelihood estimate for the proportion of sites evolving differently between clades.
