# Supplementary material for: A depauperate immune repertoire precedes evolution of sociality in bees
Source: PubMed Central journal article supplement (PMC4408586; doi:10.1186/s13059-015-0628-y), 2015-04-24
Supplement: 13059_2015_628_MOESM9_ESM.pdf [file 13059_2015_628_MOESM9_ESM.pdf]

| OrthoDB Group <sup>a</sup> | Gene <sup>b</sup>      | Classification                       | Sites <sup>c</sup> | p-value <sup>d</sup> | q-value <sup>e</sup> | Proportion <sup>f</sup> |
|----------------------------|------------------------|--------------------------------------|--------------------|----------------------|----------------------|-------------------------|
| EOG60001Z                  | atg8                   | Autophagy                            | 117                | 0.01626              | 0.02667              | 1.00000                 |
| EOG679CPZ                  | spatzle-5              | Spaetzle                             | 222                | 0.00259              | 0.00609              | 0.75101                 |
| EOG6PC86T                  | tor                    | Autophagy                            | 2317               | 0.03019              | 0.04627              | 0.65667                 |
| EOG6HDR8C                  | TLR-1                  | Toll receptor                        | 376                | 0.00159              | 0.00416              | 0.52761                 |
| EOG6KD521                  | chorion peroxidase     | Peroxidase                           | 352                | 0.00000              | 0.00000              | 0.47206                 |
| EOG60GB73-1                | PHGPx2B                | Peroxidase                           | 196                | 0.00001              | 0.00004              | 0.45950                 |
| EOG6RJJDHD                 | r2d2                   | Small RNA regulatory pathway members | 325                | 0.00026              | 0.00098              | 0.38934                 |
| EOG66DJHX-1                | dscam-like protein     | Immunoglobulin                       | 1495               | 0.00912              | 0.01613              | 0.37982                 |
| EOG66WWRH-2                | Clect-GA2              | C-type lectin                        | 169                | 0.00000              | 0.00004              | 0.37893                 |
| EOG6VX0NG-2                | PGRP-S2                | PRGP                                 | 111                | 0.01433              | 0.02424              | 0.37639                 |
| EOG6RBP1B                  | cactus                 | Toll pathway                         | 356                | 0.00000              | 0.00001              | 0.37320                 |
| EOG66WWRH-1                | Clect-GA1              | C-type lectin                        | 211                | 0.00038              | 0.00128              | 0.35494                 |
| EOG66DJHQ                  | aubergine              | Small RNA regulatory pathway members | 644                | 0.00000              | 0.00000              | 0.35278                 |
| EOG6VX0NG-1                | PGRP-LF                | PRGP                                 | 187                | 0.00019              | 0.00074              | 0.32989                 |
| EOG6X3FGJ                  | SCR-B6                 | Scavenger receptor                   | 438                | 0.00013              | 0.00054              | 0.31159                 |
| EOG634TN8                  | croquemort             | Scavenger receptor                   | 477                | 0.00015              | 0.00061              | 0.29413                 |
| EOG6J3TZ2                  | cardinal               | Peroxidase                           | 1186               | 0.00000              | 0.00000              | 0.28417                 |
| EOG6TX97R                  | CLIP-D1-like protein   | CLIP serine protease                 | 312                | 0.00038              | 0.00128              | 0.27317                 |
| EOG6QRFKP                  | CLIP-C1B               | CLIP serine protease                 | 330                | 0.00001              | 0.00004              | 0.25991                 |
| EOG6W9GK1-1                | rm62-J                 | Small RNA regulatory pathway members | 678                | 0.01019              | 0.01753              | 0.25007                 |
| EOG6FJ6RD                  | CLIP-B13               | CLIP serine protease                 | 346                | 0.00719              | 0.01389              | 0.23045                 |
| EOG6FBG9K                  | npc2a                  | MD-2-related lipid recognition       | 138                | 0.00009              | 0.00041              | 0.22516                 |
| EOG6XWDDG-1                | serpin-10A             | Serine protease inhibitor            | 375                | 0.00000              | 0.00000              | 0.22037                 |
| EOG6W9GK1-3                | rm62-B1                | Small RNA regulatory pathway members | 405                | 0.00915              | 0.01613              | 0.21828                 |
| EOG64B8H5                  | CLIP-A10               | CLIP serine protease                 | 792                | 0.01990              | 0.03188              | 0.20892                 |
| EOG6CNP6K-2                | SCR-B9                 | Scavenger receptor                   | 387                | 0.00001              | 0.00007              | 0.19529                 |
| EOG61C5BT                  | spatzle-3              | Spaetzle                             | 393                | 0.00268              | 0.00612              | 0.18193                 |
| EOG6WDBSW                  | serpin-28D             | Serine protease inhibitor            | 423                | 0.00190              | 0.00479              | 0.17266                 |
| EOG6DV43B                  | immune deficiency      | IMD pathway                          | 249                | 0.00463              | 0.00960              | 0.16254                 |
| EOG64J10C                  | ird5                   | IMD pathway                          | 343                | 0.00269              | 0.00612              | 0.15100                 |
| EOG6D254M                  | SCR-AC1                | Scavenger receptor                   | 1650               | 0.00000              | 0.00000              | 0.13877                 |
| EOG6DFN3J                  | PPO-6                  | Prophenol oxidase                    | 672                | 0.00002              | 0.00009              | 0.13747                 |
| EOG6NCJV4                  | snake                  | CLIP serine protease                 | 399                | 0.00392              | 0.00824              | 0.13438                 |
| EOG6BG79T                  | spindle-E              | Small RNA regulatory pathway members | 1268               | 0.00189              | 0.00479              | 0.13093                 |
| EOG6K6DKF                  | cactin                 | Toll pathway                         | 559                | 0.00000              | 0.00000              | 0.13066                 |
| EOG6RBP1C                  | persephone             | CLIP serine protease                 | 288                | 0.00135              | 0.00374              | 0.11960                 |
| EOG66Q57J                  | LOC100642902 (B. terr) | Serine protease inhibitor            | 1189               | 0.00000              | 0.00000              | 0.11842                 |
| EOG69W0XF                  | ran                    | Small RNA regulatory pathway members | 127                | 0.00299              | 0.00659              | 0.11155                 |
| EOG6J6Q5V                  | peroxidasin            | Peroxidase                           | 1091               | 0.00013              | 0.00054              | 0.10978                 |
| EOG6BG7B9                  | snmp1                  | Scavenger receptor                   | 430                | 0.00005              | 0.00025              | 0.10927                 |
| EOG64QRG8                  | tak1                   | c-Jun N-terminal kinases             | 150                | 0.00863              | 0.01580              | 0.10700                 |
| EOG61ZCRN                  | IAP-6                  | IAP repeat                           | 2053               | 0.00000              | 0.00001              | 0.10601                 |
| EOG68W9HQ                  | Clect-8                | C-type lectin                        | 220                | 0.00000              | 0.00000              | 0.10533                 |
| EOG634TPR                  | galectin-5             | Galectin                             | 416                | 0.01020              | 0.01753              | 0.10333                 |
| EOG6NVX17                  | argonaute-1            | Small RNA regulatory pathway members | 813                | 0.00000              | 0.00001              | 0.10250                 |
| EOG6X0K8Q                  | myd88                  | Toll pathway                         | 209                | 0.00029              | 0.00108              | 0.09836                 |
| EOG66T1GW                  | caspar                 | IMD pathway                          | 597                | 0.00101              | 0.00303              | 0.09006                 |
| EOG6CRJF5                  | masquerade             | CLIP serine protease                 | 146                | 0.00054              | 0.00166              | 0.08448                 |
| EOG634TMW                  | ranbp-21               | Small RNA regulatory pathway members | 1213               | 0.01444              | 0.02424              | 0.08406                 |
| EOG6ZPC9T                  | rm62-F                 | Small RNA regulatory pathway members | 545                | 0.00152              | 0.00412              | 0.07861                 |
| EOG6MGQPH                  | atg16L                 | Autophagy                            | 159                | 0.02075              | 0.03288              | 0.07850                 |
| EOG6VDNFR                  | dorsal                 | Relish                               | 353                | 0.00249              | 0.00596              | 0.07499                 |
| EOG634TMX                  | dicer-2                | Small RNA regulatory pathway members | 1269               | 0.00000              | 0.00000              | 0.07494                 |
| EOG6Q2BWQ                  | IAP-2                  | IAP repeat                           | 503                | 0.00000              | 0.00000              | 0.07304                 |
| EOG6KKWHX                  | argonaute-2            | Small RNA regulatory pathway members | 810                | 0.00857              | 0.01580              | 0.07167                 |
| EOG6866VT                  | tube                   | Toll pathway                         | 88                 | 0.00156              | 0.00416              | 0.06780                 |
| EOG6QRFJX                  | draper                 | Nimrod                               | 600                | 0.00000              | 0.00001              | 0.06624                 |
| EOG659ZWS                  | relish                 | Relish                               | 609                | 0.00001              | 0.00005              | 0.06560                 |
| EOG680GDM                  | eiger                  | c-Jun N-terminal kinases             | 334                | 0.00113              | 0.00318              | 0.06252                 |
| EOG6PRR5Q                  | CLIP-A30               | CLIP serine protease                 | 812                | 0.00211              | 0.00514              | 0.06208                 |
| EOG6XKSQD                  | peroxiredoxin-1        | Peroxidase                           | 208                | 0.01562              | 0.02591              | 0.06120                 |
| EOG680GC4                  | CLIP-D9                | CLIP serine protease                 | 405                | 0.00001              | 0.00007              | 0.05663                 |
| EOG6R7SS0                  | CLIP-D3                | CLIP serine protease                 | 298                | 0.00011              | 0.00051              | 0.05254                 |
| EOG6931ZS-3                | TLR-6                  | Toll receptor                        | 1217               | 0.00047              | 0.00146              | 0.05198                 |
| EOG6FN2ZK                  | hopscotch              | JAK/STAT pathway                     | 600                | 0.00000              | 0.00000              | 0.05174                 |
| EOG6HX3GG                  | stubble                | CLIP serine protease                 | 660                | 0.00626              | 0.01243              | 0.04943                 |
| EOG6612K2                  | rm62-A                 | Small RNA regulatory pathway members | 726                | 0.02569              | 0.03981              | 0.04925                 |
| EOG6KWH93                  | vig                    | Small RNA regulatory pathway members | 411                | 0.00111              | 0.00318              | 0.04554                 |
| EOG6VX0M1-1                | DBLOX                  | Peroxidase                           | 932                | 0.00707              | 0.01385              | 0.04195                 |
| EOG6RV16R-2                | BGRP-2                 | GNBP                                 | 234                | 0.00534              | 0.01092              | 0.04005                 |
| EOG6N8PNJ                  | wengen                 | c-Jun N-terminal kinases             | 211                | 0.00006              | 0.00027              | 0.03808                 |
| EOG6X0K76                  | tep3                   | Thioester-containing protein         | 301                | 0.00002              | 0.00013              | 0.03382                 |
| EOG64B8HP                  | kayak                  | c-Jun N-terminal kinases             | 184                | 0.00359              | 0.00768              | 0.03281                 |
| EOG66DJHX-2                | dscam                  | Immunoglobulin                       | 489                | 0.00000              | 0.00000              | 0.03225                 |
| EOG62547K                  | armitage               | Small RNA regulatory pathway members | 996                | 0.00030              | 0.00108              | 0.03220                 |
| EOG6W9GKN                  | atg7                   | Autophagy                            | 667                | 0.00200              | 0.00495              | 0.02937                 |
| EOG608KPT                  | LOC100642932 (B. terr) | Scavenger receptor                   | 1646               | 0.00000              | 0.00000              | 0.02900                 |
| EOG6W6MC0                  | Clect-GA3              | C-type lectin                        | 230                | 0.00046              | 0.00146              | 0.02770                 |
| EOG6JQ2CF                  | LOC100642575 (B. terr) | Scavenger receptor                   | 744                | 0.00045              | 0.00146              | 0.02633                 |
| EOG6TTF0B                  | spatzle-6              | Spaetzle                             | 385                | 0.00001              | 0.00005              | 0.02575                 |
| EOG6C2FSC                  | atg1                   | Autophagy                            | 471                | 0.00299              | 0.00659              | 0.02303                 |
| EOG6TTDZQ                  | dicer-1                | Small RNA regulatory pathway members | 1846               | 0.00820              | 0.01562              | 0.02229                 |
| EOG6GXD37                  | pasha                  | Small RNA regulatory pathway members | 369                | 0.00593              | 0.01195              | 0.01951                 |
| EOG6931ZS-2                | TLR-10                 | Toll receptor                        | 1204               | 0.00002              | 0.00013              | 0.01744                 |
| EOG6X95Z0                  | tepA                   | Thioester-containing protein         | 1559               | 0.00839              | 0.01577              | 0.01413                 |
| EOG6VX0M1-2                | DBLOX-like protein     | Peroxidase                           | 502                | 0.02493              | 0.03905              | 0.01397                 |
| EOG666T1W                  | domeless               | JAK/STAT pathway                     | 1435               | 0.00036              | 0.00128              | 0.01358                 |
| EOG6WH726                  | atg6                   | Autophagy                            | 430                | 0.00019              | 0.00074              | 0.00922                 |
| EOG61VHHT                  | Clect-SE1              | C-type lectin                        | 852                | 0.00311              | 0.00675              | 0.00744                 |
| EOG679CP4                  | POSH                   | IMD pathway                          | 852                | 0.00104              | 0.00305              | 0.00667                 |
| EOG641NSQ                  | stat                   | JAK/STAT pathway                     | 736                | 0.01989              | 0.03188              | 0.00644                 |
| EOG6931ZS-1                | TLR-7                  | Toll receptor                        | 1299               | 0.00909              | 0.01613              | 0.00572                 |

<sup>a</sup> Group identifiers are from OrthoDB 6 (<http://cegg.unige.ch/orthodb6>).<sup>b</sup> Unless otherwise specified, gene names are taken from the *A. mellifera* or *D. melanogaster* orthologs.<sup>c</sup> Total number of codons in the alignment after trimming with Gblocks.<sup>d</sup> From LRT comparing Clade model D to M3 with 3 rate categories.<sup>e</sup> Multiple test correction by the method of Benjamini and Hochberg to control the false discovery rate.<sup>f</sup> Maximum likelihood estimate for the proportion of sites evolving differently between clades.
