# Supplementary material for: A depauperate immune repertoire precedes evolution of sociality in bees
Source: PubMed Central journal article supplement (PMC4408586; doi:10.1186/s13059-015-0628-y), 2015-04-24
Supplement: 13059_2015_628_MOESM10_ESM.pdf [file 13059_2015_628_MOESM10_ESM.pdf]

Summary of models on the 4 taxa tree.

| OrthoDB Group <sup>a</sup> | Gene <sup>b</sup>      | Classification                       | Sites <sup>c</sup> | Global $\omega$ <sup>1</sup> | M8 vs M7 <sup>2</sup> | Branch-site <sup>3</sup> | Clade D <sup>4</sup> |
|----------------------------|------------------------|--------------------------------------|--------------------|------------------------------|-----------------------|--------------------------|----------------------|
| EOG6JSXPT                  | abaecin                | AMP                                  | 46                 | 0.33584                      |                       |                          | X                    |
| EOG6TDZ3C                  | defensin               | AMP                                  | 93                 | 0.2081                       |                       |                          | X                    |
| EOG6C2FSC                  | atg1                   | Autophagy                            | 476                | 0.13269                      |                       |                          | X                    |
| EOG644J2Q                  | atg10                  | Autophagy                            | 162                | 0.11878                      |                       |                          |                      |
| EOG6MGQPH                  | atg16L                 | Autophagy                            | 160                | 0.12256                      |                       |                          | X                    |
| EOG6DR7V8                  | atg18                  | Autophagy                            | 338                | 0.01356                      |                       |                          |                      |
| EOG69KD5B                  | atg2                   | Autophagy                            | 1983               | 0.07114                      |                       |                          |                      |
| EOG6D2556                  | atg4A                  | Autophagy                            | 482                | 0.06251                      |                       |                          | X                    |
| EOG602V84                  | atg4B                  | Autophagy                            | 371                | 0.05558                      |                       |                          |                      |
| EOG6P8D0V                  | atg5                   | Autophagy                            | 265                | 0.02194                      |                       |                          |                      |
| EOG6WH726                  | atg6                   | Autophagy                            | 430                | 0.01014                      |                       |                          |                      |
| EOG6W9GKN                  | atg7                   | Autophagy                            | 668                | 0.08236                      |                       |                          | X                    |
| EOG60001Z                  | atg8                   | Autophagy                            | 117                | 1e-04                        |                       |                          |                      |
| EOG6Q574K                  | atg9                   | Autophagy                            | 836                | 0.07233                      |                       |                          |                      |
| EOG6NP5KW                  | buffy                  | Autophagy                            | 270                | 0.06015                      |                       |                          |                      |
| EOG6PC86T                  | tor                    | Autophagy                            | 2407               | 0.01111                      |                       |                          |                      |
| EOG6XPNXB                  | basket                 | c-Jun N-terminal kinases             | 388                | 0.02014                      |                       |                          |                      |
| EOG680GDM                  | eiger                  | c-Jun N-terminal kinases             | 374                | 0.12769                      |                       |                          |                      |
| EOG61893B                  | hemipterous            | c-Jun N-terminal kinases             | 759                | 0.03338                      |                       |                          |                      |
| EOG6K3JCB                  | jra                    | c-Jun N-terminal kinases             | 196                | 0.27614                      |                       |                          |                      |
| EOG64B8HP                  | kayak                  | c-Jun N-terminal kinases             | 185                | 0.019                        |                       |                          |                      |
| EOG64QRG8                  | tak1                   | c-Jun N-terminal kinases             | 407                | 0.11524                      |                       |                          |                      |
| EOG6N8PNJ                  | wengen                 | c-Jun N-terminal kinases             | 293                | 0.18255                      |                       |                          | X                    |
| EOG6FBG95                  | Clect-10               | C-type lectin                        | 159                | 0.14616                      |                       |                          | X                    |
| EOG68W9HQ                  | Clect-8                | C-type lectin                        | 412                | 0.07825                      |                       |                          |                      |
| EOG66WWRH-1                | Clect-GA1              | C-type lectin                        | 217                | 0.02995                      |                       |                          |                      |
| EOG66WWRH-2                | Clect-GA2              | C-type lectin                        | 216                | 0.04598                      |                       |                          |                      |
| EOG6W6MC0                  | Clect-GA3              | C-type lectin                        | 230                | 0.02812                      |                       |                          |                      |
| EOG61VHHT                  | Clect-SE1              | C-type lectin                        | 1095               | 0.03638                      |                       |                          | X                    |
| EOG6612JX                  | Clect-SE2              | C-type lectin                        | 866                | 0.06072                      |                       |                          |                      |
| EOG6VX0M3                  | ark                    | Caspase                              | 1263               | 0.1294                       | X                     |                          | X                    |
| EOG62BVQX                  | caspase-L1             | Caspase                              | 396                | 0.16633                      |                       |                          | X                    |
| EOG6F1VKC                  | ice                    | Caspase                              | 297                | 0.12397                      |                       |                          |                      |
| EOG6Z8WBN                  | catalase               | Catalase                             | 221                | 0.10103                      |                       |                          |                      |
| EOG64B8H5                  | CLIP-A10               | CLIP serine protease                 | 816                | 0.12855                      | X                     |                          |                      |
| EOG6PRR5Q                  | CLIP-A30               | CLIP serine protease                 | 875                | 0.1305                       |                       |                          | X                    |
| EOG61NS2P                  | CLIP-A5                | CLIP serine protease                 | 308                | 0.2122                       |                       |                          | X                    |
| EOG6FJ6RD                  | CLIP-B13               | CLIP serine protease                 | 355                | 0.26853                      |                       |                          | X                    |
| EOG6QRFKP                  | CLIP-C1B               | CLIP serine protease                 | 350                | 0.3294                       |                       |                          | X                    |
| EOG6TX97G                  | CLIP-D1                | CLIP serine protease                 | 241                | 0.22975                      |                       |                          |                      |
| EOG6TX97R                  | CLIP-D1-like protein   | CLIP serine protease                 | 320                | 0.36655                      |                       |                          | X                    |
| EOG6GHX4B                  | CLIP-D10               | CLIP serine protease                 | 308                | 0.00845                      |                       |                          |                      |
| EOG6R7SS0                  | CLIP-D3                | CLIP serine protease                 | 569                | 0.09458                      |                       |                          |                      |
| EOG680GC4                  | CLIP-D9                | CLIP serine protease                 | 503                | 0.08069                      |                       |                          | X                    |
| EOG6CRJF5                  | masquerade             | CLIP serine protease                 | 603                | 0.09003                      |                       |                          |                      |
| EOG6RBP1C                  | persephone             | CLIP serine protease                 | 293                | 0.27289                      |                       |                          | X                    |
| EOG6RJJDH9                 | scarface               | CLIP serine protease                 | 622                | 0.30015                      |                       |                          | X                    |
| EOG6NCJV4                  | snake                  | CLIP serine protease                 | 404                | 0.26193                      |                       |                          |                      |
| EOG6HX3GG                  | stubble                | CLIP serine protease                 | 695                | 0.06682                      |                       |                          |                      |
| EOG6N5TBN                  | galectin-3             | Galectin                             | 1290               | 0.0529                       |                       |                          | X                    |
| EOG634TPR                  | galectin-5             | Galectin                             | 423                | 0.10772                      |                       |                          |                      |
| EOG6RV16R-1                | BGRP-1                 | GGBP                                 | 457                | 0.2749                       |                       |                          | X                    |
| EOG6RV16R-2                | BGRP-2                 | GGBP                                 | 322                | 0.22745                      |                       |                          | X                    |
| EOG69CNQ4-1                | IAP-1A                 | IAP repeat                           | 401                | 0.14696                      |                       |                          | X                    |
| EOG69CNQ4-2                | IAP-1B                 | IAP repeat                           | 346                | 0.24138                      |                       |                          | X                    |
| EOG6Q2BWQ                  | IAP-2                  | IAP repeat                           | 515                | 0.14886                      |                       |                          | X                    |
| EOG6ZCRN2                  | IAP-5                  | IAP repeat                           | 145                | 0.09251                      |                       |                          | X                    |
| EOG61ZCRN                  | IAP-6                  | IAP repeat                           | 3255               | 0.04459                      |                       |                          | X                    |
| EOG66T1GW                  | caspar                 | IMD pathway                          | 614                | 0.03108                      |                       |                          |                      |
| EOG6ZW3V0                  | fadd                   | IMD pathway                          | 144                | 0.22926                      |                       |                          |                      |
| EOG6DV43B                  | immune deficiency      | IMD pathway                          | 256                | 0.20362                      |                       |                          |                      |
| EOG64J10C                  | ird5                   | IMD pathway                          | 560                | 0.19261                      |                       |                          | X                    |
| EOG679CP4                  | POSH                   | IMD pathway                          | 866                | 0.05316                      |                       |                          | X                    |
| EOG66DJHX-2                | dscam                  | Immunoglobulin                       | 777                | 0.05496                      | X                     |                          | X                    |
| EOG66DJHX-1                | dscam-like protein     | Immunoglobulin                       | 1847               | 0.02561                      |                       | X                        | X                    |
| EOG666T1W                  | domeless               | JAK/STAT pathway                     | 1490               | 0.10803                      |                       |                          | X                    |
| EOG6FN2ZK                  | hopscotch              | JAK/STAT pathway                     | 1088               | 0.10446                      |                       |                          | X                    |
| EOG641NSQ                  | stat                   | JAK/STAT pathway                     | 774                | 0.01621                      |                       |                          | X                    |
| EOG6FBG9K                  | npc2a                  | MD-2-related lipid recognition       | 149                | 0.17968                      |                       |                          |                      |
| EOG6NVX30                  | npc2b                  | MD-2-related lipid recognition       | 127                | 0.00435                      |                       |                          |                      |
| EOG6QRFJX                  | draper                 | Nimrod                               | 945                | 0.16982                      |                       |                          | X                    |
| EOG6ZPC96                  | nimrod-C2              | Nimrod                               | 1802               | 0.12496                      |                       | X                        | X                    |
| EOG6J3TZ2                  | cardinal               | Peroxidase                           | 1203               | 0.08436                      | X                     |                          | X                    |
| EOG6KD521                  | chorion peroxidase     | Peroxidase                           | 482                | 0.0574                       |                       |                          | X                    |
| EOG6VX0M1-1                | DBLOX                  | Peroxidase                           | 944                | 0.01738                      |                       |                          | X                    |
| EOG6VX0M1-2                | DBLOX-like protein     | Peroxidase                           | 699                | 0.04801                      |                       |                          | X                    |
| EOG6J9KDP                  | Duox                   | Peroxidase                           | 1458               | 0.18854                      |                       |                          |                      |
| EOG6J6Q5V                  | peroxidasin            | Peroxidase                           | 1100               | 0.07237                      |                       |                          | X                    |
| EOG6XKSQD                  | peroxiredoxin-1        | Peroxidase                           | 208                | 0.05024                      |                       |                          | X                    |
| EOG693216-1                | peroxiredoxin-4        | Peroxidase                           | 220                | 0.12329                      |                       |                          | X                    |
| EOG693216-2                | peroxiredoxin-5        | Peroxidase                           | 220                | 0.05527                      |                       |                          |                      |
| EOG60GB73-2                | PHGPx2A                | Peroxidase                           | 166                | 0.09657                      |                       |                          |                      |
| EOG60GB73-1                | PHGPx2B                | Peroxidase                           | 198                | 0.2249                       |                       |                          | X                    |
| EOG6VX0NG-1                | PGRP-LF                | PRGP                                 | 190                | 0.06285                      |                       |                          |                      |
| EOG6VX0NG-3                | PGRP-S1                | PRGP                                 | 103                | 0.11065                      |                       |                          |                      |
| EOG6VX0NG-2                | PGRP-S2                | PRGP                                 | 117                | 0.16311                      |                       |                          |                      |
| EOG6DFN3J                  | PPO-6                  | Prophenol oxidase                    | 673                | 0.19318                      |                       |                          | X                    |
| EOG6VDNFR                  | dorsal                 | Relish                               | 476                | 0.05633                      |                       | X                        | X                    |
| EOG659ZWS                  | relish                 | Relish                               | 613                | 0.109                        |                       |                          | X                    |
| EOG634TN8                  | croquemort             | Scavenger receptor                   | 487                | 0.17554                      |                       |                          | X                    |
| EOG6JQ2CF                  | LOC100642575 (B. terr) | Scavenger receptor                   | 924                | 0.07198                      | X                     |                          | X                    |
| EOG608KPT                  | LOC100642932 (B. terr) | Scavenger receptor                   | 1893               | 0.11229                      |                       |                          | X                    |
| EOG6D254M                  | SCR-AC1                | Scavenger receptor                   | 2816               | 0.08879                      |                       |                          | X                    |
| EOG6CNP6K-1                | SCR-B3                 | Scavenger receptor                   | 569                | 0.16667                      |                       |                          | X                    |
| EOG6W0VV6                  | SCR-B5                 | Scavenger receptor                   | 494                | 0.21578                      |                       |                          |                      |
| EOG6X3FGJ                  | SCR-B6                 | Scavenger receptor                   | 437                | 0.07868                      |                       |                          | X                    |
| EOG6CNP6K-2                | SCR-B9                 | Scavenger receptor                   | 387                | 0.11332                      |                       |                          | X                    |
| EOG6HHMH6                  | serpin-23              | Scavenger receptor                   | 2066               | 0.09921                      | X                     | X                        | X                    |
| EOG6BG7B9                  | snmp1                  | Scavenger receptor                   | 484                | 0.1691                       |                       |                          | X                    |
| EOG66Q57J                  | LOC100642902 (B. terr) | Serine protease inhibitor            | 1327               | 0.29567                      |                       | X                        | X                    |
| EOG6XWDDG-1                | serpin-10A             | Serine protease inhibitor            | 385                | 0.21958                      |                       | X                        | X                    |
| EOG6XWDDG-3                | serpin-10B             | Serine protease inhibitor            | 307                | 0.17517                      |                       |                          | X                    |
| EOG6M37R0                  | serpin-27A             | Serine protease inhibitor            | 406                | 0.03255                      |                       |                          |                      |
| EOG6WDBSW                  | serpin-28D             | Serine protease inhibitor            | 601                | 0.2977                       |                       |                          | X                    |
| EOG6XWDDG-2                | serpin-9               | Serine protease inhibitor            | 365                | 0.25778                      |                       |                          | X                    |
| EOG6NVX17                  | argonaute-1            | Small RNA regulatory pathway members | 886                | 0.02329                      |                       |                          |                      |
| EOG6KKWHX                  | argonaute-2            | Small RNA regulatory pathway members | 896                | 0.12628                      | X                     | X                        | X                    |
| EOG62Z354                  | argonaute-3            | Small RNA regulatory pathway members | 814                | 0.21295                      |                       |                          | X                    |
| EOG62547K                  | armitage               | Small RNA regulatory pathway members | 1054               | 0.14429                      |                       |                          | X                    |
| EOG66DJHQ                  | aubergine              | Small RNA regulatory pathway members | 787                | 0.03453                      | X                     |                          | X                    |
| EOG6W3R35                  | belle                  | Small RNA regulatory pathway members | 683                | 0.05737                      |                       | X                        | X                    |
| EOG6TTDZQ                  | dicer-1                | Small RNA regulatory pathway members | 1908               | 0.01077                      |                       |                          | X                    |
| EOG634TMX                  | dicer-2                | Small RNA regulatory pathway members | 1334               | 0.16362                      |                       |                          | X                    |
| EOG634TN0                  | droscha                | Small RNA regulatory pathway members | 1304               | 0.02405                      |                       |                          | X                    |
| EOG6KKWJ6                  | fmr1                   | Small RNA regulatory pathway members | 377                | 0.02037                      |                       |                          | X                    |
| EOG6ZCRKS                  | loquacious             | Small RNA regulatory pathway members | 332                | 0.03403                      |                       |                          | X                    |
| EOG6GXD37                  | pasha                  | Small RNA regulatory pathway members | 638                | 0.02071                      |                       |                          |                      |
| EOG6RJJDHD                 | r2d2                   | Small RNA regulatory pathway members | 325                | 0.05218                      |                       |                          | X                    |
| EOG69W0XF                  | ran                    | Small RNA regulatory pathway members | 128                | 0.02393                      |                       |                          |                      |
| EOG634TMW                  | ranbp-21               | Small RNA regulatory pathway members | 1217               | 0.11061                      |                       |                          |                      |
| EOG6612K2                  | rm62-A                 | Small RNA regulatory pathway members | 725                | 0.14078                      |                       |                          | X                    |
| EOG6W9GK1-3                | rm62-B1                | Small RNA regulatory pathway members | 431                | 0.03383                      | X                     |                          | X                    |
| EOG6XWDCW                  | rm62-C                 | Small RNA regulatory pathway members | 526                | 0.02738                      |                       |                          | X                    |
| EOG6ZPC9T                  | rm62-F                 | Small RNA regulatory pathway members | 546                | 0.06871                      |                       |                          | X                    |
| EOG6W9GK1-2                | rm62-H                 | Small RNA regulatory pathway members | 549                | 0.05434                      |                       |                          |                      |
| EOG6VX0M4                  | rm62-I                 | Small RNA regulatory pathway members | 713                | 0.22813                      |                       |                          | X                    |
| EOG6W9GK1-1                | rm62-J                 | Small RNA regulatory pathway members | 708                | 0.00691                      |                       |                          | X                    |
| EOG6W9GK1-4                | rm62-J1                | Small RNA regulatory pathway members | 402                | 0.01879                      |                       |                          |                      |
| EOG6BG79T                  | spindle-E              | Small RNA regulatory pathway members | 1273               | 0.25716                      |                       | X                        | X                    |
| EOG6X3FG7                  | tudor-SN               | Small RNA regulatory pathway members | 872                | 0.03453                      |                       |                          | X                    |
| EOG6KWH93                  | vig                    | Small RNA regulatory pathway members | 411                | 0.22524                      |                       |                          | X                    |
| EOG6QNKCB                  | spatzle-1B             | Spaetzle                             | 169                | 0.05277                      |                       | X                        | X                    |
| EOG61C5BT                  | spatzle-3              | Spaetzle                             | 401                | 0.17389                      |                       |                          |                      |
| EOG679CPZ                  | spatzle-5              | Spaetzle                             | 277                | 0.183                        |                       |                          |                      |
| EOG6TTF0B                  | spatzle-6              | Spaetzle                             | 395                | 0.18222                      |                       |                          |                      |
| EOG68SF83                  | tep23                  | Thioester-containing protein         | 1694               | 0.09047                      |                       | X                        | X                    |
| EOG6X0K76                  | tep3                   | Thioester-containing protein         | 1379               | 0.10134                      |                       |                          | X                    |
| EOG6X95Z0                  | tepA                   | Thioester-containing protein         | 1585               | 0.15891                      |                       |                          |                      |
| EOG6K6DKF                  | cactin                 | Toll pathway                         | 569                | 0.11892                      |                       |                          |                      |
| EOG6RBP1B                  | cactus                 | Toll pathway                         | 357                | 0.22611                      |                       |                          | X                    |
| EOG6X0K8Q                  | myd88                  | Toll pathway                         | 275                | 0.21105                      |                       |                          | X                    |
| EOG6T1G2P                  | pelle                  | Toll pathway                         | 414                | 0.04759                      |                       |                          | X                    |
| EOG634TNR                  | pellino                | Toll pathway                         | 431                | 0.02026                      | X                     |                          | X                    |
| EOG64F4RN                  | traf6                  | Toll pathway                         | 409                | 0.31941                      |                       |                          | X                    |
| EOG6866VT                  | tube                   | Toll pathway                         | 298                | 0.01657                      |                       | X                        | X                    |
| EOG6H8R8C                  | TLR-1                  | Toll receptor                        | 496                | 0.03138                      |                       |                          | X                    |
| EOG6931ZS-2                | TLR-10                 | Toll receptor                        | 1280               | 0.04607                      |                       |                          |                      |
| EOG6931ZS-3                | TLR-6                  | Toll receptor                        | 1217               | 0.03131                      |                       |                          |                      |
| EOG6931ZS-1                | TLR-7                  | Toll receptor                        | 1344               | 0.08263                      |                       |                          | X                    |
| EOG6931ZS-4                | TLR-8                  | Toll receptor                        | 1184               | 0.02863                      |                       |                          |                      |

<sup>a</sup> Group identifiers are from OrthoDB 6 (<http://cegg.unige.ch/orthodb6>).<sup>b</sup> Unless otherwise specified, gene names are taken from the *A. mellifera* or *D. melanogaster* orthologs.<sup>c</sup> Total number of codons in the alignment after trimming with Gblocks.<sup>1</sup> Across the whole phylogeny using M0 model.<sup>2</sup> Positive selection across the whole phylogeny.<sup>3</sup> Positive selection on the branch between *Bombus* and *Apis*.<sup>4</sup> Different selective pressures between *Bombus* and *Apis*.

Using FDR &lt; 0.05 on all tests.
