# Supplementary material for: A depauperate immune repertoire precedes evolution of sociality in bees
Source: Springer Nature journal article supplement (doi:10.1186/s13059-015-0628-y), 2015-04-20
Supplement: MOESM11 [file 13059_2015_628_MOESM11_ESM.pdf]

Summary of models on the 5 taxa tree.

| OrthoDB Group <sup>a</sup> | Gene <sup>b</sup>      | Classification                       | Sites <sup>c</sup> | Global ω <sup>1</sup> | M8 vs M7 <sup>2</sup> | Branch-site <sup>3</sup> | Branch-site <sup>4</sup> | Branch-site <sup>5</sup> | Branch-site <sup>6</sup> | Clade D <sup>7</sup> |
|----------------------------|------------------------|--------------------------------------|--------------------|-----------------------|-----------------------|--------------------------|--------------------------|--------------------------|--------------------------|----------------------|
| EOG6JSXPT                  | abaecin                | AMP                                  | N/A                | N/A                   |                       |                          |                          |                          |                          |                      |
| EOG6TDZ3C                  | defensin               | AMP                                  | 92                 | 0.17525               |                       |                          |                          |                          |                          |                      |
| EOG6C2FSC                  | atg1                   | Autophagy                            | 471                | 0.12007               |                       |                          |                          |                          | X                        | X                    |
| EOG644J2Q                  | atg10                  | Autophagy                            | N/A                | N/A                   |                       |                          |                          |                          |                          |                      |
| EOG6MGQPH                  | atg16L                 | Autophagy                            | 159                | 0.09132               |                       |                          |                          |                          |                          | X                    |
| EOG6DR7V8                  | atg18                  | Autophagy                            | 262                | 0.03276               |                       |                          |                          |                          |                          |                      |
| EOG69KD5B                  | atg2                   | Autophagy                            | 1775               | 0.07692               |                       |                          |                          |                          |                          |                      |
| EOG6D2556                  | atg4A                  | Autophagy                            | 431                | 0.04811               |                       |                          |                          |                          |                          |                      |
| EOG602V84                  | atg4B                  | Autophagy                            | 337                | 0.05112               |                       |                          |                          |                          |                          |                      |
| EOG6P8DOV                  | atg5                   | Autophagy                            | 261                | 0.0265                |                       |                          |                          |                          |                          |                      |
| EOG6WH726                  | atg6                   | Autophagy                            | 430                | 0.01267               |                       |                          |                          |                          | X                        | X                    |
| EOG6W9GKN                  | atg7                   | Autophagy                            | 667                | 0.08185               |                       |                          |                          |                          |                          | X                    |
| EOG60001Z                  | atg8                   | Autophagy                            | 117                | 0.02379               |                       |                          |                          |                          |                          | X                    |
| EOG6Q574K                  | atg9                   | Autophagy                            | 809                | 0.07441               |                       |                          |                          |                          |                          |                      |
| EOG6NP5KW                  | buffy                  | Autophagy                            | 253                | 0.04091               |                       |                          |                          |                          |                          |                      |
| EOG6PC86T                  | tor                    | Autophagy                            | 2317               | 0.00972               |                       |                          |                          |                          |                          | X                    |
| EOG6XPNXB                  | basket                 | c-Jun N-terminal kinases             | 388                | 0.00469               |                       |                          |                          |                          |                          |                      |
| EOG680GDM                  | eiger                  | c-Jun N-terminal kinases             | 334                | 0.19204               |                       |                          |                          |                          | X                        | X                    |
| EOG61893B                  | hemipterous            | c-Jun N-terminal kinases             | 761                | 0.03714               |                       |                          |                          |                          |                          |                      |
| EOG6K3JCB                  | jra                    | c-Jun N-terminal kinases             | 196                | 0.01599               |                       |                          |                          |                          |                          |                      |
| EOG64B8HP                  | kayak                  | c-Jun N-terminal kinases             | 184                | 0.02866               |                       |                          |                          |                          |                          | X                    |
| EOG64QRG8                  | tak1                   | c-Jun N-terminal kinases             | 150                | 0.2218                |                       |                          |                          |                          | X                        | X                    |
| EOG6N8PNJ                  | wengen                 | c-Jun N-terminal kinases             | 211                | 0.18343               |                       |                          |                          |                          | X                        | X                    |
| EOG6FBG95                  | Clect-10               | C-type lectin                        | 155                | 0.14098               |                       |                          |                          |                          |                          |                      |
| EOG68W9HQ                  | Clect-8                | C-type lectin                        | 220                | 0.07941               |                       |                          |                          |                          | X                        | X                    |
| EOG66WWRH-1                | Clect-GA1              | C-type lectin                        | 211                | 0.02727               |                       |                          |                          |                          |                          | X                    |
| EOG66WWRH-2                | Clect-GA2              | C-type lectin                        | 169                | 0.04701               |                       |                          |                          |                          |                          | X                    |
| EOG6W6MC0                  | Clect-GA3              | C-type lectin                        | 230                | 0.03912               |                       |                          |                          |                          |                          | X                    |
| EOG61VHHT                  | Clect-SE1              | C-type lectin                        | 852                | 0.03676               |                       |                          |                          |                          | X                        | X                    |
| EOG6612JX                  | Clect-SE2              | C-type lectin                        | 788                | 0.05268               |                       |                          |                          |                          |                          |                      |
| EOG6VX0M3                  | ark                    | Caspase                              | 1128               | 0.11986               | X                     |                          | X                        | X                        |                          |                      |
| EOG62BVQX                  | caspase-L1             | Caspase                              | 344                | 0.15962               |                       |                          |                          |                          |                          |                      |
| EOG6F1VKC                  | ice                    | Caspase                              | 238                | 0.09912               |                       |                          |                          |                          |                          |                      |
| EOG6Z8WBN                  | catalase               | Catalase                             | 181                | 0.1076                |                       |                          | X                        |                          |                          |                      |
| EOG64B8H5                  | CLIP-A10               | CLIP serine protease                 | 792                | 0.1226                | X                     |                          |                          |                          |                          | X                    |
| EOG6PRR5Q                  | CLIP-A30               | CLIP serine protease                 | 812                | 0.10612               |                       |                          |                          |                          |                          | X                    |
| EOG61NS2P                  | CLIP-A5                | CLIP serine protease                 | N/A                | N/A                   |                       |                          |                          |                          |                          |                      |
| EOG6FJ6RD                  | CLIP-B13               | CLIP serine protease                 | 346                | 0.22864               |                       |                          |                          |                          |                          | X                    |
| EOG6QRFKP                  | CLIP-C1B               | CLIP serine protease                 | 330                | 0.24449               | X                     |                          |                          |                          |                          | X                    |
| EOG6TX97G                  | CLIP-D1                | CLIP serine protease                 | 201                | 0.17348               |                       |                          |                          |                          |                          |                      |
| EOG6TX97R                  | CLIP-D1-like protein   | CLIP serine protease                 | 312                | 0.30094               |                       |                          |                          |                          | X                        | X                    |
| EOG6GHX4B                  | CLIP-D10               | CLIP serine protease                 | 294                | 0.01051               |                       |                          |                          |                          |                          |                      |
| EOG6R7SS0                  | CLIP-D3                | CLIP serine protease                 | 298                | 0.08745               |                       |                          |                          |                          | X                        | X                    |
| EOG680GC4                  | CLIP-D9                | CLIP serine protease                 | 405                | 0.10056               |                       |                          |                          |                          |                          | X                    |
| EOG6CRJF5                  | masquerade             | CLIP serine protease                 | 146                | 0.01809               |                       |                          |                          |                          |                          | X                    |
| EOG6RBP1C                  | persephone             | CLIP serine protease                 | 288                | 0.24712               |                       |                          |                          |                          | X                        | X                    |
| EOG6RJDH9                  | scarface               | CLIP serine protease                 | 378                | 0.25097               |                       |                          |                          |                          |                          |                      |
| EOG6NCJV4                  | snake                  | CLIP serine protease                 | 399                | 0.23339               |                       |                          |                          |                          | X                        | X                    |
| EOG6HX3GG                  | stubble                | CLIP serine protease                 | 660                | 0.06449               |                       |                          |                          |                          |                          | X                    |
| EOG6N5TBN                  | galectin-3             | Galectin                             | 1280               | 0.04932               |                       |                          |                          |                          |                          |                      |
| EOG634TPR                  | galectin-5             | Galectin                             | 416                | 0.12109               |                       |                          |                          |                          |                          | X                    |
| EOG6RV16R-1                | BGRP-1                 | GNBP                                 | 459                | 0.24922               |                       |                          | X                        | X                        |                          |                      |
| EOG6RV16R-2                | BGRP-2                 | GNBP                                 | 234                | 0.18544               |                       |                          |                          |                          | X                        | X                    |
| EOG69CNQ4-1                | IAP-1A                 | IAP repeat                           | N/A                | N/A                   |                       |                          |                          |                          |                          |                      |
| EOG69CNQ4-2                | IAP-1B                 | IAP repeat                           | N/A                | N/A                   |                       |                          |                          |                          |                          |                      |
| EOG6Q2BWQ                  | IAP-2                  | IAP repeat                           | 503                | 0.1256                |                       |                          |                          |                          | X                        | X                    |
| EOG6ZCRN2                  | IAP-5                  | IAP repeat                           | 139                | 0.09978               |                       |                          |                          |                          |                          |                      |
| EOG61ZCRN                  | IAP-6                  | IAP repeat                           | 2053               | 0.05545               |                       |                          |                          |                          |                          | X                    |
| EOG66T1GW                  | caspar                 | IMD pathway                          | 597                | 0.04391               |                       |                          |                          |                          |                          | X                    |
| EOG6ZW3V0                  | fadd                   | IMD pathway                          | 134                | 0.20183               |                       |                          |                          |                          |                          |                      |
| EOG6DV43B                  | immune deficiency      | IMD pathway                          | 249                | 0.13835               |                       |                          |                          | X                        |                          | X                    |
| EOG64J10C                  | ird5                   | IMD pathway                          | 343                | 0.18295               |                       |                          |                          |                          | X                        | X                    |
| EOG679CP4                  | POSH                   | IMD pathway                          | 852                | 0.05525               |                       |                          |                          |                          | X                        | X                    |
| EOG66DJHX-2                | dscam                  | Immunoglobulin                       | 489                | 0.05362               | X                     |                          |                          |                          | X                        | X                    |
| EOG66DJHX-1                | dscam-like protein     | Immunoglobulin                       | 1495               | 0.02775               |                       |                          |                          |                          | X                        | X                    |
| EOG666T1W                  | domeless               | JAK/STAT pathway                     | 1435               | 0.1038                |                       |                          | X                        |                          | X                        | X                    |
| EOG6FN2ZK                  | hopscotch              | JAK/STAT pathway                     | 600                | 0.08975               |                       |                          |                          |                          | X                        | X                    |
| EOG641NSQ                  | stat                   | JAK/STAT pathway                     | 736                | 0.01591               |                       |                          |                          |                          |                          | X                    |
| EOG6FBG9K                  | npc2a                  | MD-2-related lipid recognition       | 138                | 0.16468               |                       |                          |                          |                          | X                        | X                    |
| EOG6NVX30                  | npc2b                  | MD-2-related lipid recognition       | 127                | 0.16092               |                       |                          |                          |                          |                          |                      |
| EOG6QRFJX                  | draper                 | Nimrod                               | 600                | 0.0648                |                       |                          |                          |                          | X                        | X                    |
| EOG6ZPC96                  | nimrod-C2              | Nimrod                               | N/A                | N/A                   |                       |                          |                          |                          |                          |                      |
| EOG6J3TZ2                  | cardinal               | Peroxidase                           | 1186               | 0.15252               |                       |                          |                          |                          | X                        | X                    |
| EOG6KD521                  | chorion peroxidase     | Peroxidase                           | 352                | 0.03149               |                       |                          |                          |                          | X                        | X                    |
| EOG6VX0M1-1                | DBLOX                  | Peroxidase                           | 932                | 0.04732               |                       |                          |                          |                          |                          | X                    |
| EOG6VX0M1-2                | DBLOX-like protein     | Peroxidase                           | 502                | 0.11747               |                       |                          |                          |                          |                          | X                    |
| EOG6J9KDP                  | Duox                   | Peroxidase                           | 1431               | 0.0144                |                       |                          |                          |                          |                          |                      |
| EOG6J6Q5V                  | peroxidasin            | Peroxidase                           | 1091               | 0.0514                |                       |                          |                          |                          |                          | X                    |
| EOG6XKSQD                  | peroxiredoxin-1        | Peroxidase                           | 208                | 0.06932               |                       |                          |                          |                          |                          | X                    |
| EOG693216-1                | peroxiredoxin-4        | Peroxidase                           | 220                | 0.06951               |                       |                          |                          |                          |                          |                      |
| EOG693216-2                | peroxiredoxin-5        | Peroxidase                           | 220                | 0.05698               |                       |                          |                          |                          |                          |                      |
| EOG60GB73-2                | PHGPx2A                | Peroxidase                           | 166                | 0.03937               |                       |                          |                          |                          |                          |                      |
| EOG60GB73-1                | PHGPx2B                | Peroxidase                           | 196                | 0.08592               |                       |                          |                          |                          |                          | X                    |
| EOG6VX0NG-1                | PGRP-LF                | PRGP                                 | 187                | 0.09501               |                       |                          |                          |                          |                          | X                    |
| EOG6VX0NG-3                | PGRP-S1                | PRGP                                 | 76                 | 0.13791               |                       |                          |                          |                          |                          |                      |
| EOG6VX0NG-2                | PGRP-S2                | PRGP                                 | 111                | 0.14224               |                       |                          |                          |                          |                          | X                    |
| EOG6DFN3J                  | PPO-6                  | Prophenol oxidase                    | 672                | 0.07601               |                       |                          |                          |                          | X                        | X                    |
| EOG6VDNFR                  | dorsal                 | Relish                               | 353                | 0.1068                |                       | X                        | X                        |                          |                          | X                    |
| EOG659ZWS                  | relish                 | Relish                               | 609                | 0.10713               |                       |                          |                          |                          | X                        | X                    |
| EOG634TN8                  | croquemort             | Scavenger receptor                   | 477                | 0.14923               |                       |                          |                          |                          |                          | X                    |
| EOG6JQ2CF                  | LOC100642575 (B. terr) | Scavenger receptor                   | 744                | 0.07663               |                       |                          |                          |                          |                          | X                    |
| EOG608KPT                  | LOC100642932 (B. terr) | Scavenger receptor                   | 1646               | 0.13449               |                       |                          |                          |                          | X                        | X                    |
| EOG6D254M                  | SCR-AC1                | Scavenger receptor                   | 1650               | 0.06841               |                       |                          |                          |                          |                          | X                    |
| EOG6CNP6K-1                | SCR-B3                 | Scavenger receptor                   | 500                | 0.07891               |                       |                          |                          |                          |                          |                      |
| EOG6W0VV6                  | SCR-B5                 | Scavenger receptor                   | 476                | 0.16861               |                       |                          |                          |                          |                          |                      |
| EOG6X3FGJ                  | SCR-B6                 | Scavenger receptor                   | 438                | 0.15942               |                       |                          |                          |                          | X                        | X                    |
| EOG6CNP6K-2                | SCR-B9                 | Scavenger receptor                   | 387                | 0.06656               |                       |                          |                          |                          |                          | X                    |
| EOG6HHMH6                  | serpin-23              | Scavenger receptor                   | 650                | 0.19767               |                       |                          |                          |                          |                          |                      |
| EOG6BG7B9                  | snmp1                  | Scavenger receptor                   | 430                | 0.10943               |                       |                          | X                        |                          |                          | X                    |
| EOG66Q57J                  | LOC100642902 (B. terr) | Serine protease inhibitor            | 1189               | 0.24741               |                       | X                        | X                        | X                        | X                        | X                    |
| EOG6XWDDG-1                | serpin-10A             | Serine protease inhibitor            | 375                | 0.16206               |                       |                          |                          |                          | X                        | X                    |
| EOG6XWDDG-3                | serpin-10B             | Serine protease inhibitor            | 307                | 0.2028                |                       |                          |                          |                          |                          |                      |
| EOG6M37R0                  | serpin-27A             | Serine protease inhibitor            | N/A                | N/A                   |                       |                          |                          |                          |                          |                      |
| EOG6WDBSW                  | serpin-28D             | Serine protease inhibitor            | 423                | 0.19085               |                       |                          |                          |                          |                          | X                    |
| EOG6XWDDG-2                | serpin-9               | Serine protease inhibitor            | 337                | 0.11636               |                       |                          |                          |                          |                          |                      |
| EOG6NVX17                  | argonaute-1            | Small RNA regulatory pathway members | 813                | 0.01837               |                       |                          |                          |                          |                          | X                    |
| EOG6KNVHX                  | argonaute-2            | Small RNA regulatory pathway members | 810                | 0.22158               | X                     | X                        | X                        |                          |                          | X                    |
| EOG62Z354                  | argonaute-3            | Small RNA regulatory pathway members | 743                | 0.11048               |                       |                          |                          |                          | X                        |                      |
| EOG62547K                  | armitage               | Small RNA regulatory pathway members | 996                | 0.09973               |                       |                          |                          |                          | X                        | X                    |
| EOG66DJHQ                  | aubergine              | Small RNA regulatory pathway members | 644                | 0.17942               |                       |                          |                          |                          | X                        | X                    |
| EOG6W3R35                  | belle                  | Small RNA regulatory pathway members | 647                | 0.04838               |                       |                          |                          |                          |                          |                      |
| EOG6TTDZQ                  | dicer-1                | Small RNA regulatory pathway members | 1846               | 0.05742               |                       |                          |                          |                          |                          | X                    |
| EOG634TMX                  | dicer-2                | Small RNA regulatory pathway members | 1269               | 0.13311               |                       |                          |                          |                          | X                        | X                    |
| EOG634TN0                  | drosha                 | Small RNA regulatory pathway members | 1290               | 0.03406               |                       |                          |                          | X                        |                          |                      |
| EOG6KKWJ6                  | fmr1                   | Small RNA regulatory pathway members | 343                | 0.02706               |                       |                          |                          |                          |                          |                      |
| EOG6ZCRKS                  | loquacious             | Small RNA regulatory pathway members | 332                | 0.07531               |                       |                          |                          |                          |                          |                      |
| EOG6GXD37                  | pasha                  | Small RNA regulatory pathway members | 369                | 0.0386                |                       |                          |                          |                          |                          | X                    |
| EOG6RJJDHD                 | r2d2                   | Small RNA regulatory pathway members | 325                | 0.20087               |                       |                          |                          |                          |                          | X                    |
| EOG69W0XF                  | ran                    | Small RNA regulatory pathway members | 127                | 0.00899               |                       |                          |                          |                          |                          | X                    |
| EOG634TMW                  | ranbp-21               | Small RNA regulatory pathway members | 1213               | 0.02043               |                       |                          |                          |                          |                          | X                    |
| EOG6612K2                  | rm62-A                 | Small RNA regulatory pathway members | 726                | 0.01941               |                       |                          |                          |                          |                          | X                    |
| EOG6W9GK1-3                | rm62-B1                | Small RNA regulatory pathway members | 405                | 0.02174               |                       |                          |                          |                          |                          | X                    |
| EOG6XWDCW                  | rm62-C                 | Small RNA regulatory pathway members | 492                | 0.0699                |                       |                          |                          | X                        |                          |                      |
| EOG6ZPC9T                  | rm62-F                 | Small RNA regulatory pathway members | 545                | 0.09114               |                       |                          | X                        |                          |                          | X                    |
| EOG6W9GK1-2                | rm62-H                 | Small RNA regulatory pathway members | 482                | 0.01533               |                       |                          |                          |                          |                          |                      |
| EOG6VX0M4                  | rm62-I                 | Small RNA regulatory pathway members | 712                | 0.00638               |                       |                          |                          |                          |                          |                      |
| EOG6W9GK1-1                | rm62-J                 | Small RNA regulatory pathway members | 678                | 0.02782               |                       |                          |                          |                          |                          | X                    |
| EOG6W9GK1-4                | rm62-J1                | Small RNA regulatory pathway members | 353                | 0.037                 |                       |                          |                          |                          |                          |                      |
| EOG6BG79T                  | spindle-E              | Small RNA regulatory pathway members | 1268               | 0.11096               |                       |                          |                          |                          |                          | X                    |
| EOG6X3FG7                  | tudor-SN               | Small RNA regulatory pathway members | 772                | 0.02586               |                       |                          |                          |                          |                          |                      |
| EOG6KWH93                  | vig                    | Small RNA regulatory pathway members | 411                | 0.05636               |                       |                          |                          |                          |                          | X                    |
| EOG6QNKCB                  | spatzle-1B             | Spatzle                              | N/A                | N/A                   |                       |                          |                          |                          |                          |                      |
| EOG61C5BT                  | spatzle-3              | Spatzle                              | 393                | 0.06832               |                       |                          |                          |                          |                          | X                    |
| EOG679CPZ                  | spatzle-5              | Spatzle                              | 222                | 0.12895               |                       |                          |                          |                          |                          | X                    |
| EOG6TTF0B                  | spatzle-6              | Spatzle                              | 385                | 0.03401               |                       |                          |                          |                          | X                        | X                    |
| EOG68SF83                  | tep23                  | Thioester-containing protein         | N/A                | N/A                   |                       |                          |                          |                          |                          |                      |
| EOG6X0K76                  | tep3                   | Thioester-containing protein         | 301                | 0.0597                |                       |                          |                          |                          | X                        | X                    |
| EOG6X95Z0                  | tepA                   | Thioester-containing protein         | 1559               | 0.04577               |                       |                          |                          |                          |                          |                      |
| EOG6K6DKF                  | cactin                 | Toll pathway                         | 559                | 0.03088               |                       |                          |                          |                          |                          | X                    |
| EOG6RBP1B                  | cactus                 | Toll pathway                         | 356                | 0.17196               |                       |                          |                          |                          |                          | X                    |
| EOG6X0K8Q                  | myd88                  | Toll pathway                         | 209                | 0.10847               |                       |                          | X                        |                          | X                        | X                    |
| EOG6T1G2P                  | pelle                  | Toll pathway                         | 381                | 0.11016               |                       |                          |                          |                          |                          |                      |
| EOG634TNR                  | pellino                | Toll pathway                         | 428                | 0.01095               |                       |                          |                          |                          |                          |                      |
| EOG64F4RN                  | traf6                  | Toll pathway                         | 363                | 0.10241               |                       |                          |                          |                          |                          |                      |
| EOG6866VT                  | tube                   | Toll pathway                         | 88                 | 0.11664               |                       |                          |                          |                          | X                        | X                    |
| EOG6HDR8C                  | TLR-1                  | Toll receptor                        | 376                | 0.25801               |                       |                          |                          |                          |                          | X                    |
| EOG6931ZS-2                | TLR-10                 | Toll receptor                        | 1204               | 0.03589               |                       |                          |                          |                          |                          | X                    |
| EOG6931ZS-3                | TLR-6                  | Toll receptor                        | 1217               | 0.03869               |                       |                          |                          |                          |                          | X                    |
| EOG6931ZS-1                | TLR-7                  | Toll receptor                        | 1299               | 0.02839               |                       |                          | X                        |                          |                          | X                    |
| EOG6931ZS-4                | TLR-8                  | Toll receptor                        | 1177               | 0.01807               |                       |                          |                          |                          |                          |                      |

<sup>a</sup> Group identifiers are from OrthoDB 6 (<http://cegg.unige.ch/orthodb6>).<sup>b</sup> Unless otherwise specified, gene names are taken from the *A. mellifera* or *D. melanogaster* orthologs.<sup>c</sup> Total number of codons in the alignment after trimming with Gblocks.<sup>1</sup> Across
